1 **Mutation of lipoprotein processing pathway gene *lspA* or inhibition of LspA activity by**  
2 **globomycin increases MRSA resistance to  $\beta$ -lactam antibiotics**

3

4

5

6 Claire Fingleton<sup>1</sup>, Merve S. Zeden<sup>1</sup>, Emilio Bueno<sup>2</sup>, Felipe Cava<sup>2</sup> and James P. O’Gara<sup>1\*</sup>

7

8

9

10 <sup>1</sup>Microbiology, School of Natural Sciences, National University of Ireland, Galway, Ireland.

11

12 <sup>2</sup>Department of Molecular Biology, Umeå University, MIMS - Laboratory for Molecular  
13 Infection Medicine Sweden, Umeå, Sweden.

14

15

16 \*For correspondence: jamesp.ogara@nuigalway.ie

17

18

19

20 **Running title:** Lipoprotein processing and  $\beta$ -lactam susceptibility in MRSA

21

22 **Abstract**

23 The *Staphylococcus aureus* cell envelope comprises numerous components, including  
24 peptidoglycan (PG), wall teichoic acids (WTA), lipoteichoic acids (LTA), targeted by  
25 antimicrobial drugs. MRSA resistance to methicillin is mediated by the *mecA*-encoded  $\beta$ -  
26 lactam-resistant transpeptidase, penicillin binding protein 2a (PBP2a). However, PBP2a-  
27 dependent  $\beta$ -lactam resistance is also modulated by the activity of pathways involved in the  
28 regulation or biosynthesis of PG, WTA or LTA. Here, we report that mutation of the lipoprotein  
29 signal peptidase II gene, *lspA*, from the lipoprotein processing pathway, significantly increased  
30  $\beta$ -lactam resistance in MRSA. Mutation of *lgt*, which encodes diacylglycerol transferase (Lgt)  
31 responsible for synthesis of the LspA substrate did not impact  $\beta$ -lactam susceptibility.  
32 Consistent with previous reports, *lgt* and *lspA* mutations impaired growth in chemically  
33 defined media, but not in complex broth. MRSA exposure to the LspA inhibitor globomycin  
34 also increased  $\beta$ -lactam resistance. Mutation of *lgt* in an *lspA* background restored  $\beta$ -lactam  
35 resistance to wild type. The *lspA* mutation had no effect on PBP2a expression, PG composition  
36 or autolytic activity indicating a potential role for WTA or LTA. The *lspA* and *lgt* mutants  
37 exhibited marginally increased resistance to the D-alanine pathway inhibitor D-cycloserine. In  
38 addition, mutation of *lgt* and multicopy *lspA* expression, but not mutation of *lspA*, significantly  
39 increased susceptibility to the lipoteichoic acid synthase inhibitor Congo red revealing  
40 complex interplay between lipoprotein processing mutations and the expression/stability of  
41 cell surface glycopolymers. These findings indicate that accumulation of the LspA substrate,  
42 diacylglyceryl lipoprotein, increases MRSA resistance to  $\beta$ -lactam antibiotics through impacts  
43 on cell envelope components other than PG.

## 44 Introduction

45 The cell envelope of *Staphylococcus aureus* comprises a cytoplasmic membrane surrounded  
46 by a thick peptidoglycan layer, cell wall-anchored proteins, lipoteichoic acids (LTA), wall  
47 teichoic acids (WTA) and cell surface proteins. Accurate biosynthesis, assembly and stability  
48 of these cell envelope components is essential for the growth and pathogenesis of *S. aureus*,  
49 and is the target of numerous antimicrobial agents (1). The peptidoglycan layer determines  
50 cell shape and protects the cell from osmotic lysis, cell surface proteins have important roles  
51 in adhesion, biofilm formation, and immune evasion, and teichoic acids are involved in  
52 protecting the cell from the activity of cationic antimicrobial peptides.

53 Methicillin resistance in MRSA is mediated by the *mecA*-encoded, low-affinity penicillin-  
54 binding protein 2a (PBP2a) carried on the mobile staphylococcal cassette chromosome *mec*  
55 resistance (HeR) under laboratory growth conditions. HeR strains can become highly or  
56 homogeneously resistant (HoR) after selection on elevated  $\beta$ -lactam concentrations via  
57 poorly understood mechanisms, which require accessory mutations at other chromosomal  
58 loci frequently associated with activation of the stringent response, cyclic-di-adenosine  
59 monophosphate (c-di-AMP) signalling pathway (2-5), the activity of RNA polymerase (6) and  
60 the ClpXP chaperone-protease complex (7,8). In addition, methicillin susceptible *S. aureus*  
61 strains (MSSA) lacking *mecA* can also acquire low-level resistance through adaptive mutations  
62 impacting the c-di-AMP signalling pathway and ClpXP activity (9).

63 Bacterial lipoproteins are a class of lipid-modified membrane proteins, involved in a range of  
64 diverse functions such as; nutrient acquisition (10), signal transduction (11), respiration (12),  
65 protein folding (13), virulence (14), antibiotic resistance (15) and host invasion (16). Mature  
66 lipoproteins are composed of lipid moieties, specifically acyl groups, linked to the N-terminus  
67 of a protein. The hydrophobic nature of the acyl groups serves as a membrane anchor for the  
68 lipoprotein (17). In Gram-negative bacteria, lipoproteins reside in both the cytoplasmic and  
69 outer membranes, while in Gram-positive bacteria they are anchored in the outer leaflet of  
70 the cytoplasmic membrane and the protein portion may extend into the cell wall and beyond  
71 (18).

72 Lipoprotein genes are estimated to comprise 1-3% of all genes in bacterial genomes (18).  
73 While many lipoproteins have been identified and experimentally validated, others are  
74 putatively identified using predictive software, thus their functions remain unknown (19). A

75 recent bioinformatic evaluation of Staphylococcal lipoproteins in the MRSA strain USA300  
76 identified 67 lipoproteins, comprising 2.57% of all genes (18). When grouped by function, 25  
77 of the 67 lipoproteins were implicated in ion (notably iron) and nutrient transport, 8 were  
78 ascribed miscellaneous functions including sex pheromone biosynthesis, respiration,  
79 chaperone-folding, and protein translocation and 15 were classified as tandem lipoproteins,  
80 of which 9 are “lipoprotein-like” lipoproteins, known to play a role in host cell invasion (16).  
81 The remaining 19 lipoproteins were not assigned any known function.

82 Lipoproteins are synthesised in a precursor form called prelipoproteins. The N-terminal  
83 domain includes a type II signal peptide, approximately 20 amino acids in length (20), which  
84 enables translocation of prelipoproteins to the cytoplasmic membrane, predominantly via  
85 the general secretory (Sec) pathway (21). The signal peptide has 3 distinct domains; a  
86 positively charged N domain, a hydrophobic H domain and a C-terminal lipobox. The lipobox  
87 is comprised of a conserved 3-amino acid sequence [LVI]<sub>-3</sub> [ASTVI]<sub>-2</sub> [GAS]<sub>-1</sub> in front of an  
88 invariant cysteine residue [C]<sub>+1</sub> (22,23). This lipobox serves as a recognition site for enzymes  
89 of the lipoprotein processing pathway, enabling lipid modification of the cysteine residue, and  
90 cleavage of the signal peptide between the amino acid at position -1 and the +1 cysteine (22).  
91 The first enzyme in the lipoprotein processing pathway is diacylglycerol transferase (Lgt)  
92 which covalently attaches a diacylglycerol molecule from phosphatidyl glycerol onto the  
93 sulfhydryl group of the invariant cysteine, resulting in a prolipoprotein (24). This diacylglycerol  
94 serves as a membrane anchor. Next, the type II lipoprotein signal peptidase (Lsp) cleaves the  
95 signal peptide between the amino acid at position -1 and +1, leaving the invariant cysteine  
96 residue as the new terminal amino acid (25). Lgt and Lsp are conserved in all bacterial species.  
97 In Gram-negative bacteria, a third step is catalysed by the enzyme N-acyl transferase (Lnt),  
98 which transfers an N-acyl group onto the invariant cysteine residue at the N-terminal of the  
99 protein (26). Lnt homologs have been identified in high-GC Gram-positive bacteria (27) but  
100 not in low-GC Firmicutes. Despite the lack of an apparent Lnt homolog, N-acylated  
101 lipoproteins have been identified in *S. aureus* (28) and recent work has identified two novel  
102 non-contiguous genes *InsA* and *InsB* which catalyse the N-terminal acylation of lipoproteins  
103 in *S. aureus* (29). The membrane metalloprotease Eep and the EcsAB transporter were shown  
104 to be involved in the processing and export of linear peptides, including the signal peptide  
105 cleaved by LspA in the lipoprotein processing pathway (30-32). Lgt and Lsp are essential for  
106 the viability of Gram-negative bacteria (33). In contrast, *lgt* and *lspA* mutations do not impact

107 viability in Gram-positive bacteria (34), but are associated with changes in growth,  
108 immunogenicity (35) and virulence (14) phenotypes.

109 In this study, we characterised the impact of *lspA* and *lgt* mutations, alone and in  
110 combination, on susceptibility to  $\beta$ -lactams, D-cycloserine and Congo red, growth, PBP2a  
111 expression, peptidoglycan structure, and autolytic activity in MRSA. The impact of  
112 globomycin, which is known to inhibit LspA activity, on  $\beta$ -lactam susceptibility was also  
113 characterised. Our data suggest that accumulation of the LspA substrate, diacylglyceryl-  
114 prolipoprotein, modulates resistance to  $\beta$ -lactam antibiotics in MRSA.

115 **Results**

116

117 **Mutation of *lspA* in MRSA increases resistance to  $\beta$ -lactam antibiotics.** The Nebraska  
118 Transposon Mutant Library (NTML) (36) was screened to identify mutants exhibiting altered  
119 susceptibility to cefoxitin, which is recommended as a surrogate for measuring *mecA*-  
120 mediated oxacillin resistance in clinical laboratories, in accordance with Clinical and  
121 Laboratory Standards Institute (CLSI) guidelines for disk diffusion susceptibility assays.  
122 Mutants identified by this screen included NE869 (*yjbH*) (37), NE1909 (*sagA*) (38) and NE810  
123 (*cycA*)(39), all of which have previously been implicated in  $\beta$ -lactam resistance. A new mutant  
124 identified in this screen was NE1757 (*lspA*::Tn), which exhibited increased resistance to  
125 cefoxitin (Fig 1A, B). PCR was used to confirm the presence of *lspA*::Tn allele in NE1757 (data  
126 not shown). Using E-test strips, as described in the methods, oxacillin MIC of the *lspA* mutant  
127 NE1757 was found to be 128 - 256  $\mu$ g/ml, compared to 32 - 64  $\mu$ g/ml for JE2 (Fig. 1C). Two  
128 JE2 transductants carrying the *lspA*::Tn allele from NE1757 also exhibited increased resistance  
129 to oxacillin (Fig. 1C).

130 The increased oxacillin resistance phenotype of NE1757 was also complemented by the  
131 introduction of a plasmid (pLI50)-borne copy of the wild type *lspA* gene (*p**lspA*) into the  
132 mutant. Growth of JE2, NE1757, NE1757 pLI50 and NE1757 *p**lspA* on MHA 2% NaCl  
133 supplemented with oxacillin 32  $\mu$ g/ml visually demonstrated that carriage of the  
134 complementation plasmid reversed the increased oxacillin resistance phenotype of NE1757  
135 (Fig. S1). Measurement of oxacillin MICs by agar dilution showed that NE1757 and NE1757  
136 pLI50 had MICs of 256  $\mu$ g/ml, while JE2 and the complemented strain NE1757 *p**lspA* had MICs  
137 of 64  $\mu$ g/ml (Table 1).

138 Comparison of JE2 and NE1757 growth in MHB, MHB 2% NaCl, TSB and TSB 0.5 mg/ml oxacillin  
139 revealed no significant differences (Fig. S2). Similarly, population analysis profiling revealed  
140 that the heterogeneous pattern of oxacillin resistance expressed by JE2 was unchanged in  
141 NE1757 (Fig. S3). These observations indicate that the increased  $\beta$ -lactam resistance  
142 phenotype of NE1757 was not attributable to any growth advantage or change in the  
143 heterogeneous/homogeneous oxacillin resistance profile.

144 Comparative WGS analysis confirmed that the only change in the NE1757 genome was the  
145 insertion of the *Bursa aurealis* transposon in the *lspA* gene at position 1192002 (Table S1) and  
146 there were no SNPs present. The NE1757 genome was also checked manually for zero

147 coverage regions to confirm the absence of any large deletions and insertions. Taken together  
148 these data indicate that mutation of *lspA*, which encodes lipoprotein signal peptidase II  
149 involved in the lipoprotein processing pathway (Fig. 2), increases resistance to oxacillin and  
150 cefoxitin in JE2.

151  
152 **Mutation of *lspA* does not affect PBP2a expression or peptidoglycan structure and**  
153 **crosslinking.** One of the numerous lipoproteins processed by LspA is PrsA, a chaperone and  
154 foldase protein, reported to play a role in PBP2a folding and  $\beta$ -lactam resistance (40). To  
155 investigate if improper processing of PrsA, or another lipoprotein, in the *lspA* mutant  
156 impacted on PBP2a, Western blotting was used to compare PBP2a expression in JE2, NE1757  
157 and NE1757 *p/lspA*. The MSSA strain 8325-4 was included as a *mecA*-negative control. Growth  
158 of JE2 and NE1757 in MHB without 2% NaCl at 37°C (data not shown) or MHB with 2% NaCl  
159 at 35°C supplemented with 0.5  $\mu$ g/ml oxacillin (Fig. 3A) revealed similar levels of PBP2a  
160 expression in all strains.

161 Quantitative peptidoglycan compositional analysis was performed using UPLC analysis of  
162 muramidase-digested muropeptide fragments extracted from exponential or stationary  
163 phase cultures of JE2 and NE1757 grown in MHB or MHB supplemented with oxacillin 3  $\mu$ g/ml  
164 or 32  $\mu$ g/ml. The PG profile of JE2 and the *lspA* mutant NE1757 were similar under all growth  
165 conditions tested (Fig. 3B). Thus, supplementation of MHB with oxacillin was associated with  
166 significant changes in muropeptide oligomerization and reduced crosslinking, but these  
167 effects were the same in both JE2 and NE1757 (Fig. S4). The total PG concentrations extracted  
168 from JE2 and NE1757 cell pellets were also the same (data not shown). Comparison of Triton  
169 X-100-induced autolysis in JE2 and NE1757 also revealed identical autolytic profiles (Fig. S5).  
170 Finally, the NaCl tolerance phenotypes of JE2 and NE1757 were also similar (Fig. S6), indicating  
171 that c-di-AMP signalling, which has previously been implicated in the control of  $\beta$ -lactam  
172 resistance, autolytic activity and NaCl tolerance (4,5) was unaffected by the *lspA* mutation.  
173 These data indicate that increased  $\beta$ -lactam resistance in the *lspA* mutant was not associated  
174 with significant changes in PG abundance, structure, crosslinking, c-di-AMP signalling or  
175 autolytic activity.

176  
177 **Exposure to the LspA inhibitor globomycin also increases  $\beta$ -lactam resistance.** Globomycin  
178 is a natural peptide antibiotic, first discovered in 1978, produced by 4 different strains of

179 actinomycetes (41,42). It is an inhibitor of LspA and works by sterically blocking the active site  
180 of the enzyme (43). Globomycin has moderate to strong antibacterial activity against many  
181 Gram-negative species and has been proposed to cause disruption of cell surface integrity  
182 (44). However, despite its ability to inhibit LspA, globomycin does not have significant  
183 antimicrobial activity against Gram-positive bacteria including *S. aureus*, with MICs >100  
184  $\mu\text{g/ml}$  (41,42,45).

185 Because disruption of *lspA* increased resistance to  $\beta$ -lactams, we hypothesized that chemical  
186 inhibition of LspA by globomycin may also be associated with increased  $\beta$ -lactam resistance.  
187 To test this hypothesis, the susceptibility of JE2 and NE1757 to oxacillin was determined in  
188 the presence or absence of globomycin. A series of JE2 and NE1757 cultures grown in MHB  
189 2% NaCl were used to determine that oxacillin 40  $\mu\text{g/ml}$  inhibited growth of JE2 but not  
190 NE1757 (Fig. 4A) as predicted. Next, JE2 MHB 2% NaCl 40  $\mu\text{g/ml}$  oxacillin cultures were further  
191 supplemented with 10, 20, 30, 40 or 50  $\mu\text{g/ml}$  globomycin (Fig. 4B). Oxacillin-induced  
192 inhibition of JE2 growth was rescued globomycin, optimally at 10, 20 and 30  $\mu\text{g/ml}$  (Fig. 4B).  
193 Growth of JE2 in 40  $\mu\text{g/ml}$  oxacillin and 50  $\mu\text{g/ml}$  globomycin was substantially impacted  
194 compared to lower globomycin concentration (Fig. 4B) indicating that the antagonism of  
195 oxacillin by globomycin was dose dependent.

196 These experiments were extended to USA300\_FPR3757, from which JE2 is derived and  
197 ATCC43300, a SCCmec type II MRSA clinical isolate. Oxacillin concentrations of 50  $\mu\text{g/ml}$  and  
198 30  $\mu\text{g/ml}$  inhibited growth of USA300 and ATCC4330, respectively (Fig. 5). Globomycin  
199 concentrations (determined empirically for each strain) of 20  $\mu\text{g/ml}$  for USA300 (Fig. 4C) and  
200 30  $\mu\text{g/ml}$  for ATCC43300 (Fig. 4D) rescued growth in the presence of oxacillin. These data  
201 demonstrate that the increased oxacillin resistance phenotype observed in the *lspA* mutant  
202 NE1757, can be replicated by globomycin-induced inhibition of LspA activity in wild type JE2  
203 and other MRSA strains.

204 In contrast to the observation that globomycin increased  $\beta$ -lactam resistance in wild type JE2,  
205 USA300 and ATCC43300, the growth of NE1757 in a range of globomycin concentrations from  
206 10 – 50  $\mu\text{g/ml}$  had a dose-dependent and negative effect on growth in the presence of  
207 oxacillin 40 $\mu\text{g/ml}$  (Fig. S7). Taken together, these data suggest that globomycin antagonises  
208  $\beta$ -lactam antibiotics, increasing MRSA resistance to oxacillin and cefotaxime in a LspA-  
209 dependent manner. However, in the absence of *lspA*, the combination of globomycin and



210 oxacillin interferes with growth of JE2, particularly at higher concentrations of globomycin,  
211 perhaps due to off-target effects.

212 To determine if globomycin could also increase resistance to other classes of  $\beta$ -lactam  
213 antibiotics, its effect on cefotaxime resistance in JE2, USA300 and ATCC43300 was evaluated.  
214 Cefotaxime was chosen because it is a 3<sup>rd</sup> generation cephalosporin with broad spectrum  
215 activity against Gram-positive and Gram-negative bacteria commonly used in the clinic,  
216 whereas oxacillin is a narrow-spectrum penicillin antibiotic. Cefotaxime 40  $\mu$ g/ml inhibited  
217 growth of JE2 and USA300 (Fig. 5A and B), while 30  $\mu$ g/ml inhibited growth of ATCC43300 (Fig.  
218 5C). Globomycin (30  $\mu$ g/ml) rescued growth of all three strains in oxacillin (Fig. 5A, B and C)  
219 suggesting that globomycin-mediated inhibition of LspA may antagonise the activity of many  
220 or all  $\beta$ -lactam antibiotics.

221  
222 **Mutation of *lgt* increases susceptibility to the lipoteichoic acid synthase inhibitor Congo**  
223 **red.** Congo red was recently identified as a selective inhibitor of lipoteichoic acid synthase  
224 (LtaS) activity (46). To investigate the possible involvement of LTA expression or stability in  
225 the increased resistance of the *lspA* mutant to  $\beta$ -lactams serial dilutions of overnight *lspA*, *lgt*  
226 and *lspA/lgt* mutant cultures were spotted onto TSA 0.125% Congo Red. Our data showed  
227 that mutation of *lgt* dramatically increased susceptibility to the selective LtaS inhibitor Congo  
228 red (Fig. 6) suggesting that impaired lipoprotein processing affects the expression or stability  
229 of LTA. However, while the *lgt/lspA* double mutant was even more susceptible to Congo red  
230 than the single *lgt* mutant, the single *lspA* mutations in NE1757 and NE1757 MM did not  
231 significantly alter Congo red susceptibility and complementation of NE1757 was also  
232 associated with increased susceptibility (Fig. 6). These data show that mutation of *lgt* or  
233 multicopy expression of *lspA* both increase susceptibility to this LTA inhibitor indicating that  
234 the lipoprotein processing pathway impacts LTA synthesis/stability in a complex manner. The  
235 mutations in the *lgt* and *lspA* genes alone, and in particular when combined, significantly  
236 increased resistance to the alanylation pathway inhibitor D-cycloserine (DCS)(Table 1).  
237 However lack of correlation between the effects of *lgt* and *lspA* mutations on susceptibility to  
238 Congo red, DCS and  $\beta$ -lactams indicates that further analysis is needed to better understand  
239 the interactions between lipoprotein processing pathway intermediates and the  
240 expression/stability of LTA and WTA.

241

242 **Mutation of *lgt* in the *lspA* background restores wild type levels of  $\beta$ -lactam resistance.** LspA  
243 catalyses the second major step in the lipoprotein processing pathway (Fig. 2). To probe the  
244 contribution of lipoprotein processing to LspA-controlled oxacillin resistance, we compared  
245 the impact of *lgt*, *lspA* and *lgt/lspA* mutants on growth and resistance to oxacillin, as well as  
246 cefotaxime, nafcillin and vancomycin. Lgt catalyses the addition of a diacylglycerol moiety  
247 onto prelipoproteins, from which the signal peptide is then cleaved by LspA (Fig. 2). To  
248 construct a *lspA/lgt* double mutant the erythromycin resistance marker of the *lspA*::Tn allele  
249 in NE1757 was first exchanged for a markerless transposon to generate a strain designated  
250 NE1757 MM into which the erythromycin-marked *lgt*::Tn allele from NE1905 was transduced.  
251 Comparison of growth of JE2, NE1757, NE1757 MM, NE1905 and the *lgt/lspA* double mutant  
252 NE1757 MM /NE1905 revealed no significant differences MHB, MHB with 2% NaCl or TSB (Fig.  
253 7A, B, C). However, consistent with previous analysis of a *lgt* mutant (35), the *lspA*, *lgt* and in  
254 particular the *lgt/lspA* mutants exhibited impaired growth in CDM (Fig. 7D), suggesting that  
255 aberrant lipoprotein processing may affect nutrient acquisition under substrate-limiting  
256 conditions.

257 The *lgt* mutant NE1905 exhibited no changes in susceptibility to oxacillin, cefotaxime, nafcillin  
258 or vancomycin (Table 1). As observed for oxacillin, the *lspA* mutant NE1757 was more  
259 resistant to cefotaxime and nafcillin and these phenotypes were complemented by the *p/lspA*  
260 plasmid (Table 1). Neither the *lspA* nor *lgt* mutations increased resistance to vancomycin  
261 (Table 1). Oxacillin and nafcillin MICs were restored to wild type levels in the *lspA/lgt* double  
262 mutant, and the cefotaxime MIC was significantly reduced (Table 1).

263 Taken together, these data indicate that while mutation of *lspA* or *lgt* or both impact growth  
264 in CDM, only mutation of *lspA* alone is associated with increased  $\beta$ -lactam resistance. The *lgt*  
265 mutation and possible accumulation of unprocessed prolipoproteins (Fig. 8A,B) does not  
266 increase  $\beta$ -lactam resistance, whereas the possible accumulation of diacylglyceryl-lipoprotein  
267 in a *lspA* mutant (Fig. 8C, D) is associated with this phenotype. The oxacillin, cefotaxime and  
268 nafcillin MICs of the *ecsB* mutant from the NTML were the same as wild type (Table 1)  
269 indicating that downstream processing of the LspA-cleaved signal peptide is not associated  
270 with altered  $\beta$ -lactam resistance.

271 **Discussion**

272 Advances in our understanding of the accessory factors that control levels of *mecA*/PBP2a-  
273 dependent resistance to methicillin has the potential to reveal new therapeutic targets and  
274 drugs that may facilitate the reintroduction of other  $\beta$ -lactam antibiotics for the treatment of  
275 MRSA infections. In this study, we demonstrated that mutation of the lipoprotein processing  
276 pathway gene *lspA*, or inhibition of LspA with globomycin increased resistance to  $\beta$ -lactam  
277 antibiotics. Although numerous mutations impacting the stringent response (ppGpp) and c-  
278 di-AMP signalling are associated with the transition from a heterogeneous to homogeneous  
279 pattern of resistance and elevated PBP2a expression (2,3), our data show that the *lspA*  
280 mutation was not associated with a HoR phenotype, increased PBP2a expression, or altered  
281 NaCl tolerance (which is controlled by c-di-AMP) (4,5). On the other hand, changes in  $\beta$ -lactam  
282 resistance independent of altered PBP2a regulation has long been known (47-49), and several  
283 auxiliary factors known to influence  $\beta$ -lactam resistance in MRSA have been described (49-  
284 54). In addition to unchanged PBP2a expression, no evidence of peptidoglycan remodelling  
285 was observed in NE1757 after growth in the presence or absence of oxacillin, potentially  
286 implicating wall teichoic acid (WTA) or lipoteichoic acid (LTA) synthesis or stability in the *lspA*  
287 mutant phenotype. Inhibition of WTA synthesis was previously shown to decrease  $\beta$ -lactam  
288 resistance in a PBP2a-independent manner (50). Reduced LTA stability, as evidenced by  
289 Western blotting and increased susceptibility to the selective lipoteichoic acid synthase  
290 inhibitor Congo red, was recently correlated with a PBP2a-independent reduction in  $\beta$ -lactam  
291 resistance in auxiliary factor *auxA* and *auxB* mutants (49). Interestingly AuxA is structurally  
292 similar to SecDF (49) and may interact with Sec pathway and lipoprotein processing (Fig. 8).  
293 The *lgt* mutant was significantly more susceptible to Congo red than the *lspA* mutant and  
294 multicopy expression of *lspA* also increased Congo red susceptibility suggesting that although  
295 the lipoprotein processing pathway modulates LTA synthesis/stability, the relationship  
296 between these two pathways appears to be complex.

297 Consistent with previous studies of lipoprotein pathway processing mutants in *S. aureus* (35),  
298 *Listeria monocytogenes* (55) and *Streptococcus agalactiae* (56), our analysis also showed that  
299 the *lgt*, *lspA* and *lgt/lspA* double mutants all exhibited impaired growth in CDM but not in TSB  
300 or MHB indicating that the impact of lipoprotein processing pathway mutations on nutrient  
301 acquisition and growth under nutrient limiting conditions can be compensated in rich media.

302 Mutation of the *lgt* gene from the lipoprotein processing pathway (Figs. 2, 7) did not affect  $\beta$ -  
303 lactam resistance and introduction of the *lgt* mutation into a *lspA* mutant restored wild type  
304 levels of resistance. These data implicate accumulation of diacylglycerol lipoprotein in  
305 elevated  $\beta$ -lactam resistance. Consistent with this possibility, lipoproteins were retained in  
306 the membrane of a *S. agalactiae* *lspA* mutant, but were released into the supernatant in large  
307 concentrations by *lgt* and *lgt/lspA* mutants (56). Lipoproteins synthesised by the *S. agalactiae*  
308 *lspA* mutant retained their signal peptide, which was absent in a *lgt* mutant with LspA activity.  
309 Importantly, signal peptide processing also occurred in the *lgt/lspA* double mutant, albeit  
310 with cleavage occurring between different amino acids, implicating the involvement of an  
311 alternative signal peptidase. Our analysis revealed no change in oxacillin susceptibility in the  
312 MRSA *lgt/lspA* double mutant, indicating that even if an alternative peptidase can cleave the  
313 signal peptide, this may not impact  $\beta$ -lactam resistance. Furthermore, mutation of *ecsB*,  
314 which has recently been implicated in export of linear peptides from the lipoprotein  
315 processing pathway in *S. aureus* (32), did not change the oxacillin MIC in JE2 (Table 1) also  
316 indicating that downstream processing of signal peptides cleaved from lipoproteins by LspA  
317 is not associated with altered  $\beta$ -lactam resistance. In *L. monocytogenes*, deletion of *lgt* also  
318 led to significant release of lipoproteins into the supernatant. However, treatment of the *L.*  
319 *monocytogenes* *lgt* mutant with globomycin (inhibiting LspA activity) resulted in enhanced  
320 lipoprotein retention in the membrane (55), suggesting that the impact of globomycin and  
321 *lspA* mutation on lipoprotein processing is not necessarily the same. In a *S. aureus* *lgt* mutant,  
322 the Götzt group reported that the majority of lipoprotein (lacking signal peptide) was released  
323 into the supernatant (35). Taken together, the data suggest that accumulation of membrane-  
324 anchored diacylglycerol lipoprotein with uncleaved signal peptide, or lipoprotein that is mis  
325 localised or released due to aberrant signal peptide processing by an alternative peptidase, is  
326 accompanied by increased  $\beta$ -lactam resistance in MRSA.  
327

## 328 **Experimental procedures**

329 **Bacterial strains and culture conditions.** Bacterial strains and plasmids used in this study are  
330 listed in Table S2. *Escherichia coli* strains were grown in Luria-Bertani (LB) broth or agar (LBA).  
331 *S. aureus* strains were grown in Tryptic Soy Broth (TSB), Tryptic Soy Agar (TSA) or chemically  
332 defined medium (CDM) (57). Muller Hinton Broth (MHB) or Muller Hinton Agar (MHA) (Oxoid)  
333 supplemented with 2% NaCl where indicated, were used for antimicrobial susceptibility  
334 testing (AST). Antibiotic concentrations used were 10 µg/ml erythromycin, 10 µg/ml  
335 chloramphenicol, 75 µg/ml kanamycin, 100 µg/ml ampicillin.

336 Two hundred and fifty ml flasks were filled with 25 ml growth media, and overnight cultures  
337 were used to inoculate the media at a starting OD<sub>600</sub> of 0.05. Overnight cultures were grown  
338 in TSB, and washed once in 5 ml PBS before being used to inoculate the CDM cultures. Flasks  
339 were incubated at 37°C shaking at 200 rpm. OD<sub>600</sub> readings were measured at 1 - 2 h intervals.  
340 Colony forming units (CFU) were enumerated in serially diluted 20 µl aliquots removed from  
341 flask cultures. Three independent biological replicates were performed for each strain and  
342 the resulting data plotted using GraphPad Prism software.

343 Data from growth experiments in a Tecan Sunrise microplate instrument were recorded by  
344 Magellan software. Overnight cultures were adjusted to an OD<sub>600</sub> of 1 in fresh media and 10  
345 µl inoculated into 200 µl media per well before being incubated at 37°C for 24 h with shaking.  
346 OD<sub>600</sub> was recorded every 15 min. For CDM, overnight TSB cultures were first washed in 5 ml  
347 PBS and adjusted to OD<sub>600</sub> of 1 in PBS.

348  
349 **Genetic manipulation of *S. aureus*.** Phage 80α transduction was used to verify the association  
350 between antibiotic resistance phenotypes and transposon insertion-marked mutations from  
351 the NTML as described previously (39). Transductants were verified by PCR amplification of  
352 the target locus using primers listed in Table S3. The plasmid pTnT, which contains a  
353 truncated, markerless transposon was used to construct a markerless *lspA* mutant designated  
354 NE1757 MM, as described previously (58). A double *lgt/lspA* double mutant was subsequently  
355 constructed using phage 80α to transduce the *lgt::Tn* allele from NE1905 into NE1757 MM. A  
356 1324 bp fragment encompassing the *lspA* gene was PCR amplified from JE2 genomic DNA  
357 using primers NE1757\_INF#3\_Fwd and NE1757\_INF#3\_Rev (Table 2), purified with GenElute™  
358 PCR Clean-Up Kit and cloned into the *E. coli* - *Staphylococcus* shuttle vector pLI50 digested  
359 with *EcoRI* (New England Biolabs) using In-Fusion® HD Cloning Kit (Clontech) to generate

360 *p/spA*. Using electroporation, *p/spA* was transformed sequentially into Stellar™ (*E. coli* HST08)  
361 (Clontech), *S. aureus* RN4220 and finally NE1757.

362

363 **Disk diffusion susceptibility assays.** Cefoxitin disk diffusion susceptibility assays were  
364 performed in accordance with CLSI guidelines. Briefly, isolates were grown at 37°C on MHA  
365 for 24 h and 5 - 6 colonies were resuspended in 0.85% saline to OD<sub>600</sub> of 0.08 - 0.1 (0.5  
366 McFarland; 1 × 10<sup>8</sup> CFU/ml) and swabbed onto MHA plates with a uniform agar depth of 4  
367 mm. A 30 µg cefoxitin disk (Oxoid) was applied, the plate incubated at 35°C for 16 - 18 h and  
368 the zone of inhibition diameter measured. Strains were classified as sensitive, intermediate,  
369 or resistant, according to CLSI criteria.

370

371 **Minimum inhibitory concentration (MIC) measurements.** For oxacillin M.I.C.Evaluators  
372 (Oxoid) several colonies from 24 h MHA plates were resuspended in 0.85% saline to OD<sub>600</sub> of  
373 0.08 - 0.1, (0.5 McFarland standard) and evenly swabbed onto MHA 2% NaCl (4 mm agar  
374 depth). An M.I.C.Evaluator strip was applied and the plate incubated at 35°C for 24 h. Three  
375 biological repeats were performed for each strain.

376 For broth microdilution MIC measurements using 96-well plates, each plate row was used to  
377 prepare two-fold dilutions of antibiotic in MHB, typically ranging from 256 - 0.5 µg/ml across  
378 10 wells. For oxacillin and nafcillin MIC measurements, MHB 2% NaCl was used. Several  
379 colonies from 24 h MHA plates were resuspended in 0.85% saline to OD<sub>600</sub> of 0.08 - 0.1 (0.5  
380 McFarland standard), diluted 1:20 in 0.85% saline and 10 µl of this cell suspension used to  
381 inoculate each well (approximately 5 × 10<sup>4</sup> CFU/well) in a final volume of 100 µl. The plates  
382 were incubated at 35°C for 16 - 20 h, or 24 h incubation for oxacillin and nafcillin. The MIC  
383 was the lowest concentration of antimicrobial agent that completely inhibited growth.

384 Freshly prepared MHA plates (with 2% NaCl when using oxacillin and nafcillin) were  
385 supplemented with antimicrobial agents at 0.5, 1, 2, 4, 8, 16, 32, 64, 128 and 256 µg/ml to  
386 perform agar dilution MIC measurements. The inoculum was prepared as described for the  
387 broth microdilution method above before being further diluted 1:20 in 0.85% saline and 4 µl  
388 spot-inoculated onto each plate (approximately 10<sup>4</sup> CFU per 5-8 mm diameter spot). The MIC  
389 was the lowest concentration of antimicrobial agent that completely inhibited growth after  
390 16-18 h (24 h for oxacillin and nafcillin) at 35°C, disregarding a single colony or a faint haze  
391 associated with the inoculum.



392 Congo red susceptibility assays were performed as described previously (59). Briefly,  
393 overnight cultures grown in TSB were adjusted to an OD<sub>600</sub> of 1 in PBS, serially diluted and  
394 spotted onto TSA plates supplemented with 1% aqueous Congo red solution (VWR) to a final  
395 concentration of 0.125%. Plates were incubated for 24 h at 37°C. These assays were  
396 performed with at least 3 biological repeats and representative image is shown for TSA  
397 0.125% Congo red.

398  
399 **Autolytic activity assays.** Overnight cultures (20 µl) were inoculated into 20 ml TSB, grown at  
400 37°C (200 rpm) to OD<sub>600</sub> of 0.5, washed with 20 ml cold PBS, resuspended in 1 ml cold PBS  
401 and finally adjusted to OD<sub>600</sub> of 1. Triton X-100 was added at a final concentration of 0.1% v/v  
402 and the cell suspension incubated at 37°C with shaking (200 rpm). OD<sub>600</sub> was recorded every  
403 30 min for 4 h. Autolytic activity was expressed as a percentage of the initial OD<sub>600</sub>. NE406  
404 (*atl::Tn*) was used as a control and at least 3 biological replicates performed for each strain.

405  
406 **Globomycin and β-lactam antibiotic synergy/antagonism assays.** One hundred µl of MHB  
407 cefotaxime or MHB 2% NaCl oxacillin was added to the individual wells of 96-well plates. The  
408 oxacillin or cefotaxime concentration chosen for each strain was based on approximate MICs  
409 i.e. the lowest antibiotic concentration that inhibited growth. Overnight MHB cultures were  
410 resuspended in PBS at OD<sub>600</sub> of 0.1 (0.5 McFarland standard) and then further diluted 1:20  
411 before 10 µl (approximately 5 × 10<sup>5</sup> CFU/ml ) was added to each well and the plates were  
412 incubated at 35°C with shaking on a Tecan Sunrise microplate instrument for 20 h  
413 (cefotaxime) or 24 h (oxacillin). Globomycin ranging from 10 - 100 µg/ml was added to the  
414 cefotaxime or oxacillin cultures to measure potential synergism or antagonism. Three  
415 independent biological replicates were performed for each strain and antibiotic combination.

416  
417 **PBP2a western blot analysis.** Overnight MHB cultures were used to inoculate 25 ml of MHB  
418 2% NaCl, with or without 0.5 µg/ml oxacillin to a starting OD<sub>600</sub> of 0.05, incubated at 35°C (200  
419 rpm shaking) until an OD<sub>600</sub> of 0.8 was reached before the cells were pelleted and  
420 resuspended in PBS to an OD<sub>600</sub> of 10. Six µl of lysostaphin (10 µg/ml) and 1 µl of DNase (10  
421 µg/ml) was added to 500 µl of this concentrated cell suspension before being incubated at  
422 37°C for 40 min. Next, 50 µl of 10% SDS was added and the incubation continued for a further  
423 20 min. The lysed cells were then pelleted in a microcentrifuge for 15 min, following which  
424 the protein-containing supernatant was collected and total protein concentration

425 determined using the Pierce® BCA Protein Assay Kit. Samples containing 8 µg total protein  
426 were mixed 1:1 with protein loading buffer (2x) (National Diagnostics) and incubated at 95°C  
427 for 5 min and loaded onto a 7.5% Tris-Glycine gel and separated at 120 V for 60 mins.  
428 Electrophoretic transfer to a PVDF membrane was carried out at 30 V for 30 min on the Trans-  
429 Blot Turbo Transfer System (Biorad). The PVDF membrane was blocked overnight in 5% skim  
430 milk powder in PBS at 4°C. The following day, the membrane was washed in fresh PBS. Anti-  
431 PBP2a (Abnova) was diluted 1:1000 in PBS-Tween 20 (0.1%) and incubated with the  
432 membrane for 1 h at room temperature. The membrane was washed in PBS to remove  
433 unbound antibody. The secondary antibody, HRP-rec-Protein G (Invitrogen) was diluted  
434 1:2000 in PBS-Tween 20 (0.1%) and incubated with the membrane at room temperature for  
435 1 h. Visualisation of the membrane was performed with the Opti-4CN Substrate kit (Biorad).  
436 Three independent experiments were performed and representative images of the  
437 developed PVDF membrane were recorded.

438  
439 **Population level antibiotic resistance profile analysis.** Characterisation of the population  
440 resistance profile was performed as described previously (60). Overnight cultures were grown  
441 in TSB, adjusted to an OD<sub>600</sub> of 1, 10-fold serially diluted from 10<sup>-1</sup> to 10<sup>-7</sup>, and a 20 µl aliquot  
442 of each dilution plated onto a series of TSA agar plates supplemented with oxacillin 0.25, 0.5,  
443 1, 2, 4, 8, 16, 32, 64 and 128 µg/ml. CFUs were enumerated after overnight incubation at 37°C  
444 and the results were expressed as CFU/ml at each oxacillin concentration. Three independent  
445 experiments were performed for each strain.

446  
447 **Antibiotic tolerance assay.** Tolerance assays were performed as described previously (61).  
448 Briefly overnight TSB cultures were sub-cultured into 25 ml of fresh TSB in 250 ml flasks at a  
449 starting OD<sub>600</sub> of 0.05 and grown to an OD<sub>600</sub> of 0.5 at 37°C with 200 rpm shaking. At this time  
450 (T<sub>0</sub>) an aliquot was removed for CFU enumeration and 12.5 µg/ml oxacillin promptly added  
451 before the cultures were re-incubated. Antibiotic tolerance was expressed as the % CFU/ml  
452 after 2, 4, 6, 8 and 24 h growth in the antibiotic compared to the CFU/ml at T<sub>0</sub>. The results  
453 represent 3 biological replicates of each strain.

454  
455 **Salt tolerance assay.** Overnight TSB cultures were adjusted to an OD<sub>600</sub> of 1 in fresh TSB and  
456 serially diluted from 10<sup>-1</sup> to 10<sup>-7</sup>. Four µl of each dilution was spot-inoculated onto TSA 2.2M  
457 NaCl plates and incubated at 37°C overnight.



458  
459 **Genomic DNA extraction and Whole Genome Sequencing (WGS).** Genomic DNA (gDNA)  
460 extractions were performed using the Wizard® Genomic DNA Purification Kit (Promega)  
461 following pre-treatment of *S. aureus* cells with 10 µg/ml lysostaphin (Ambi Products LLC) at  
462 37°C for 30 min. WGS was performed by MicrobesNG (<http://www.microbesng.uk>) using an  
463 Illumina sequencing platform with 2x250 bp paired-end reads. CLC Genomics Workbench  
464 software (Qiagen) was used for genome sequencing analysis of strains. As a reference  
465 genome, a contig was produced for wild type JE2 by mapping Illumina reads onto the closely  
466 related USA300 FPR3757 genome sequence (RefSeq accession number NC\_07793.1). The  
467 Illumina short read sequences from NE1757 were then mapped onto the assembled JE2  
468 sequence and the presence of the transposon insertion confirmed. Single Nucleotide  
469 Polymorphisms (SNPs), deletions or insertions were mapped in the NE1757 genome and  
470 presence of large deletions ruled out by manually searching for zero coverage regions using  
471 the CLC Genomics Workbench software.

472  
473 **Peptidoglycan analysis.** For each strain and growth condition tested, independent  
474 quadruplicate 50 ml cultures were grown to an OD<sub>600</sub> of 0.5, harvested and resuspended in 5  
475 ml PBS before peptidoglycan was extracted as described previously (39,62). Mass  
476 spectrometry was performed on a Waters XevoG2-XS QToF mass spectrometer. Structural  
477 characterization of muropeptides was determined based on their MS data and MS/MS  
478 fragmentation pattern, matched with PG composition and structure reported previously (63-  
479 66).

480  
481

## 482 **Acknowledgements**

483  
484 This study was funded by grants from the Health Research Board (HRA-POR-2015-1158 and  
485 ILP-POR-2019-102) ([www.hrb.ie](http://www.hrb.ie)), the Irish Research Council (GOIPG/2016/36)  
486 ([www.research.ie](http://www.research.ie)), Science Foundation Ireland (19/FFP/6441) ([www.sfi.ie](http://www.sfi.ie)) to J.P.O'G, and  
487 Svenska Forskningsrådet Formas to F.C. We are grateful to Christopher Campbell and Laura  
488 Gallagher for assistance and advice throughout this study. The illustrations in Figures 2 and 8  
489 were created with Biorender.com.

490

491

492

493

494

495

496

497

498

499

## **Table and Figures**

500

501

502 **Table 1.** Antibacterial activity of oxacillin, cefotaxime, nafcillin, vancomycin and D-cycloserine  
 503 (MIC measurements;  $\mu\text{g}/\text{ml}^1$ ) against ATCC 29213 (control), JE2, NE1757 (*lspA::Tn*), NE1757  
 504 *p/lspA*, NE1757 pLI50, NE1757 MM (markerless *lspA* mutant), NE1757 MM *p/lspA*, JE2 *lspA::Tn*  
 505 #2 (transductant), NE1905 (*lgt::Tn*), NE1757/NE1905 double mutant *lspA/lgt* and NE107  
 506 (*ecsB*).

| Strain                            | Oxacillin | Cefotaxime | Nafcillin | Vancomycin | D-Cycloserine |
|-----------------------------------|-----------|------------|-----------|------------|---------------|
| ATCC 29213                        | $\geq 1$  | 2          | 0.5       | 1          | 32            |
| JE2                               | 32 - 64   | 64         | 32        | 1          | 32            |
| NE1757 ( <i>lspA</i> )            | 128 - 256 | 256        | 64        | 1          | 16 - 32       |
| NE1757 <i>p/lspA</i>              | 64        | 64         | 32        | 1          | 16 - 32       |
| NE1757 pLI50                      | 256       | 256        | -         | 1          | 16 - 32       |
| NE1757 MM                         | 128 - 256 | 256        | 64        | -          | -             |
| NE1757 MM <i>p/lspA</i>           | 64        | 64         | 32        | -          | -             |
| JE2 <i>lspA::Tn</i> #2            | 128 - 256 | 256        | -         | 1          | 16 - 32       |
| NE1905 ( <i>lgt</i> )             | 64        | 64         | 32        | 1          | 16 - 32       |
| NE1757/NE1905 ( <i>lspA/lgt</i> ) | 64        | 128        | 32        | 1          | 16            |
| NE107 ( <i>ecsB</i> )             | 64        | 64         | 32        | 1          | 16 - 32       |

507 <sup>1</sup> MIC measurements ( $\mu\text{g}/\text{ml}$ ) were performed by MH agar dilution in accordance with CLSI  
 508 standards.

509

510

511

512

513

514  
515  
516  
517  
518

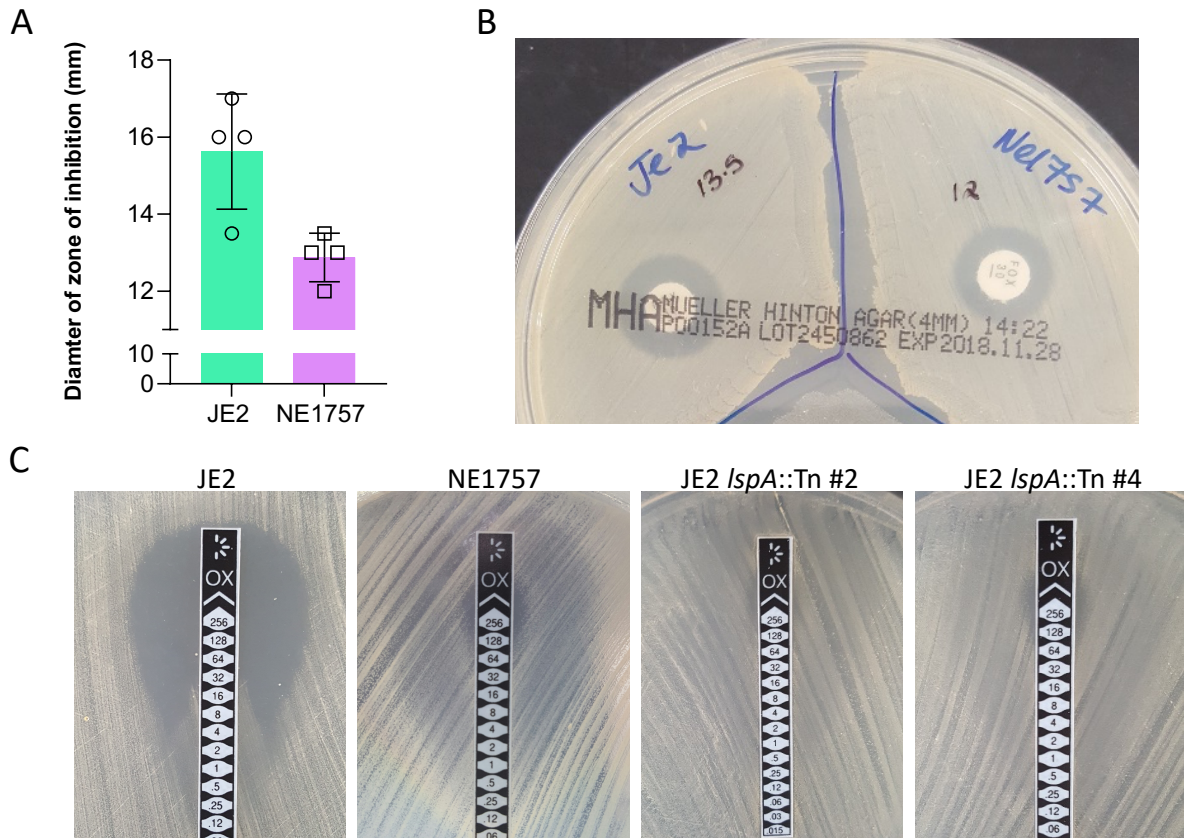

519  
520 **Fig. 1. Mutation of *lspA* increases resistance to cefoxitin and oxacillin.** (A) Average diameters  
521 of the cefoxitin disk zones of inhibition for JE2 and NE1757 (*lspA::Tn*) from 4 independent  
522 experiments, plotted using Prism software (GraphPad). (B) Representative image of JE2 (left)  
523 and NE1757 (right) grown on MH agar with a cefoxitin 30  $\mu$ g disk. (C) M.I.C.Evaluator  
524 measurement of oxacillin minimum inhibitory concentrations (MICs) in JE2, NE1757 (*lspA::Tn*),  
525 and two independent JE2 transductants (#2 and #4) carrying the *lspA::Tn* allele grown on MHB  
526 2% NaCl agar. This assay was repeated 3 independent times for each strain and a  
527 representative image is shown.

528

529

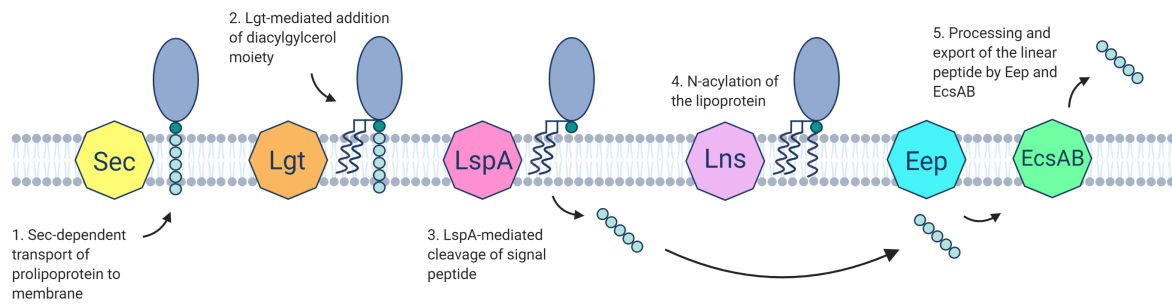

530

531

532 **Fig. 2. Role of LspA in the proposed model of lipoprotein processing in Gram-positive**

533 **bacteria.** Lipoproteins are synthesized in the cytoplasm as precursors. **1.** Prolipoprotein is

534 translocated usually via the Sec machinery through recognition of its signal peptide (SP). This

535 sequence also contains the lipobox specific for bacterial lipoproteins. **2.** Diacylglyceryl

536 transferase (Lgt) catalyzes the transfer of a diacylglyceryl group from phosphatidylglycerol

537 onto the prolipoprotein resulting in diacylglyceryl-prolipoprotein. **3.** Lipoprotein signal

538 peptidase II (LspA) recognizes the diacylglyceryl-modified signal peptide and cleaves between

539 the amino acid at position-1 and the lipid-modified cysteine residue at +1. **4.** The lipoprotein

540 N-acylation transferase system (Lns) converts diacyl lipoproteins to triacylated lipoprotein

541 (29). **5.** Eep and EcsAB play roles in the processing and secretion of linear peptides (32).

542

543

A

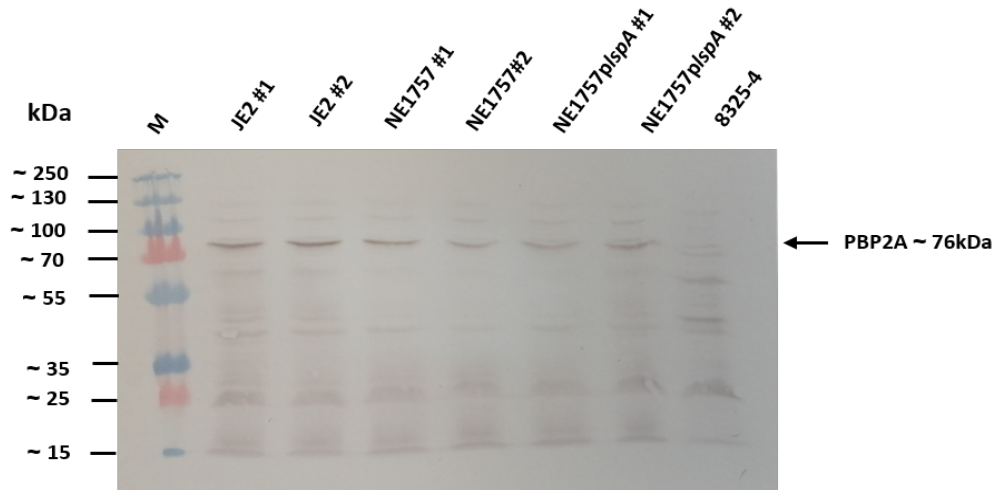

B

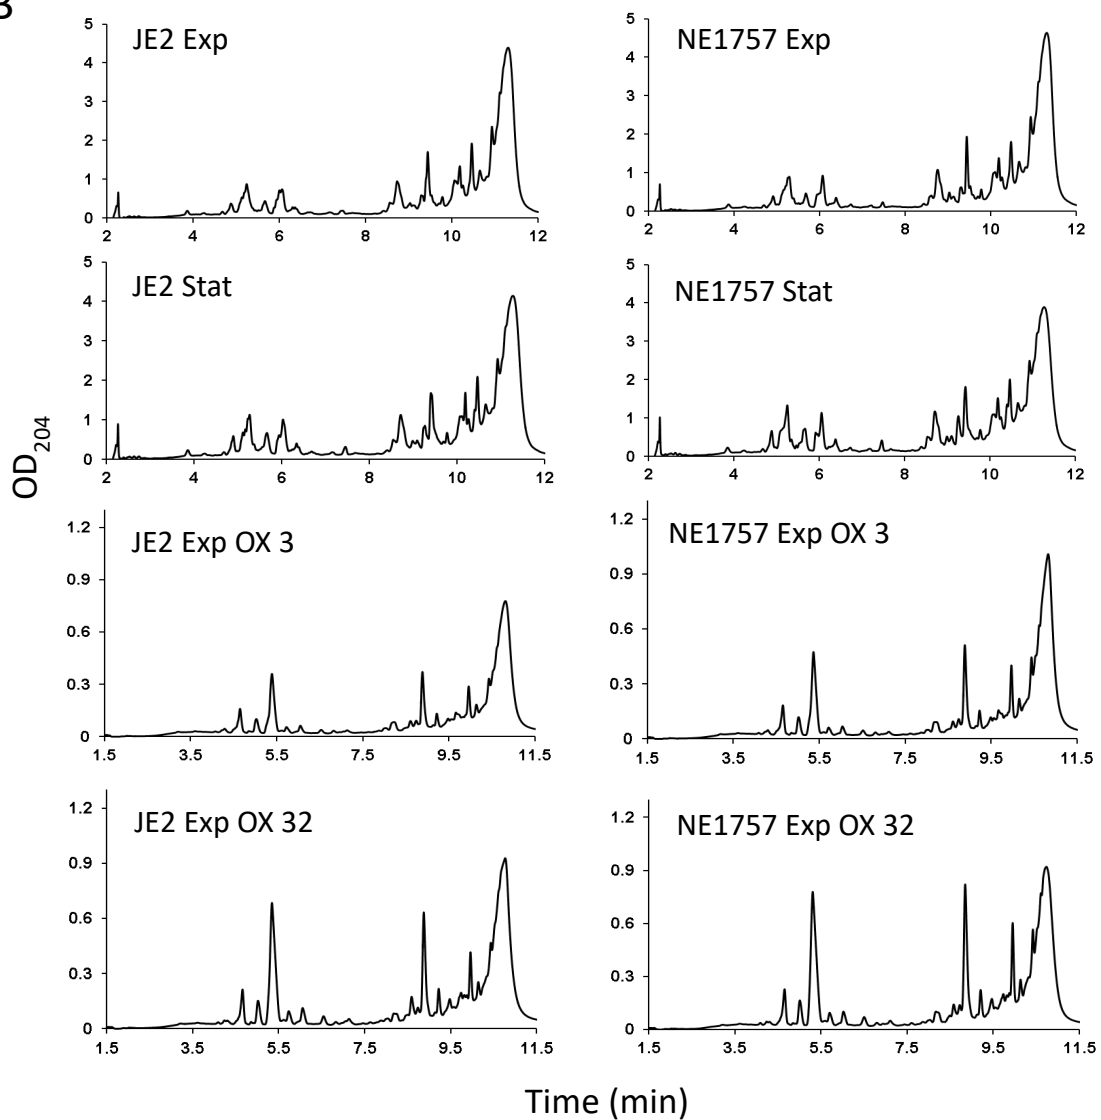

544

545

546

547

**Fig. 3. Mutation of *lspA* does not affect PBP2a expression levels or peptidoglycan structure and crosslinking.** (A) Western blot of PBP2a protein in JE2, NE1757 (*lspA*), NE1757 p*lspA* and MSSA strain 8325-4 (negative control). Cells were grown to exponential stage in MHB 2% NaCl

548 supplemented with 0.5 µg/ml oxacillin, with the exception of 8325-4 which was grown in MHB  
549 2% NaCl. For each sample, 8 µg total protein was run on a 7.5% Tris-Glycine gel, transferred  
550 to a PVDF membrane and probed with anti-PBP2a (1:1000), followed by HRP-conjugated  
551 protein G (1:2000) and colorimetric detection with Opti-4CN Substrate kit. Three independent  
552 experiments were performed and a representative image is shown. **(B)** Representative UV  
553 chromatograms of peptidoglycan extracted from JE2 and NE1757 collected from cultures  
554 grown to exponential or stationary phase in MHB or MHB supplemented with oxacillin 3  
555 µg/ml or 32 µg/ml. Each profile shown is a representative of 3 biological replicates.

556

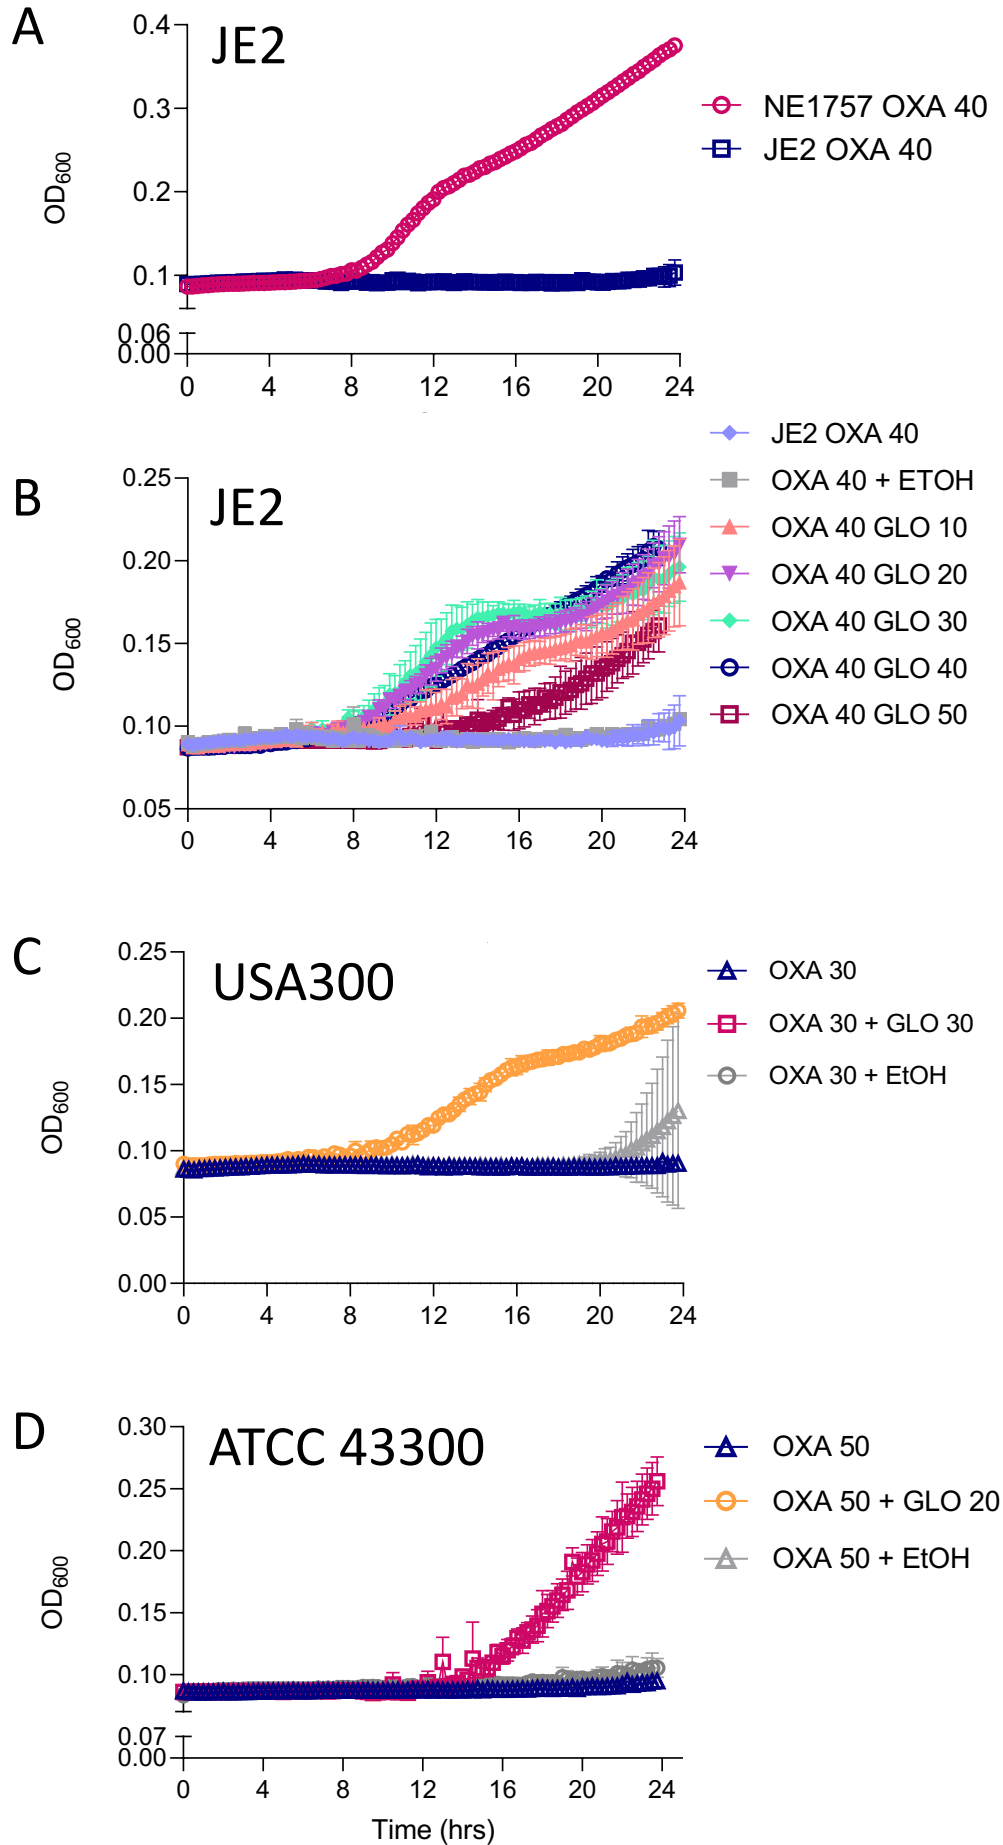



557 **Fig. 4. Mutation of *lspA* or exposure to globomycin increases oxacillin resistance. (A)** JE2 and  
558 NE1757 (*lspA*) grown in MHB 2% NaCl supplemented with oxacillin 40 µg/ml. **(B)** JE2 grown in  
559 MHB 2% NaCl supplemented with oxacillin 40 µg/ml and globomycin concentrations ranging  
560 from 10-50 µg/ml or MHB 2% NaCl supplemented with oxacillin 40 µg/ml and 0.6% ethanol  
561 (control solvent for globomycin). **(C)** USA300 grown in MHB 2% NaCl supplemented with  
562 oxacillin 50 µg/ml, MHB 2% NaCl supplemented with oxacillin 50 µg/ml and globomycin 20  
563 µg/ml or MHB 2% NaCl supplemented with oxacillin 50 µg/ml and 0.6% ethanol (control  
564 solvent for globomycin). **(D)** ATCC 43300 grown in MHB 2% NaCl supplemented with oxacillin  
565 30 µg/ml, MHB 2% NaCl supplemented with oxacillin 30 µg/ml and globomycin 30 µg/ml or  
566 MHB 2% NaCl supplemented with oxacillin 50 µg/ml and 0.6% ethanol (control solvent for  
567 globomycin). The oxacillin and globomycin concentrations used in these experiments were  
568 determined empirically for each strain. Cultures were grown in a Tecan Sunrise incubated  
569 microplate reader for 24 h at 35°C. OD<sub>600</sub> was recorded at 15 min intervals and growth curves  
570 were plotted in Prism software (GraphPad). The data presented are the average of 3  
571 independent biological replicates, and error bars represent standard deviations.  
572

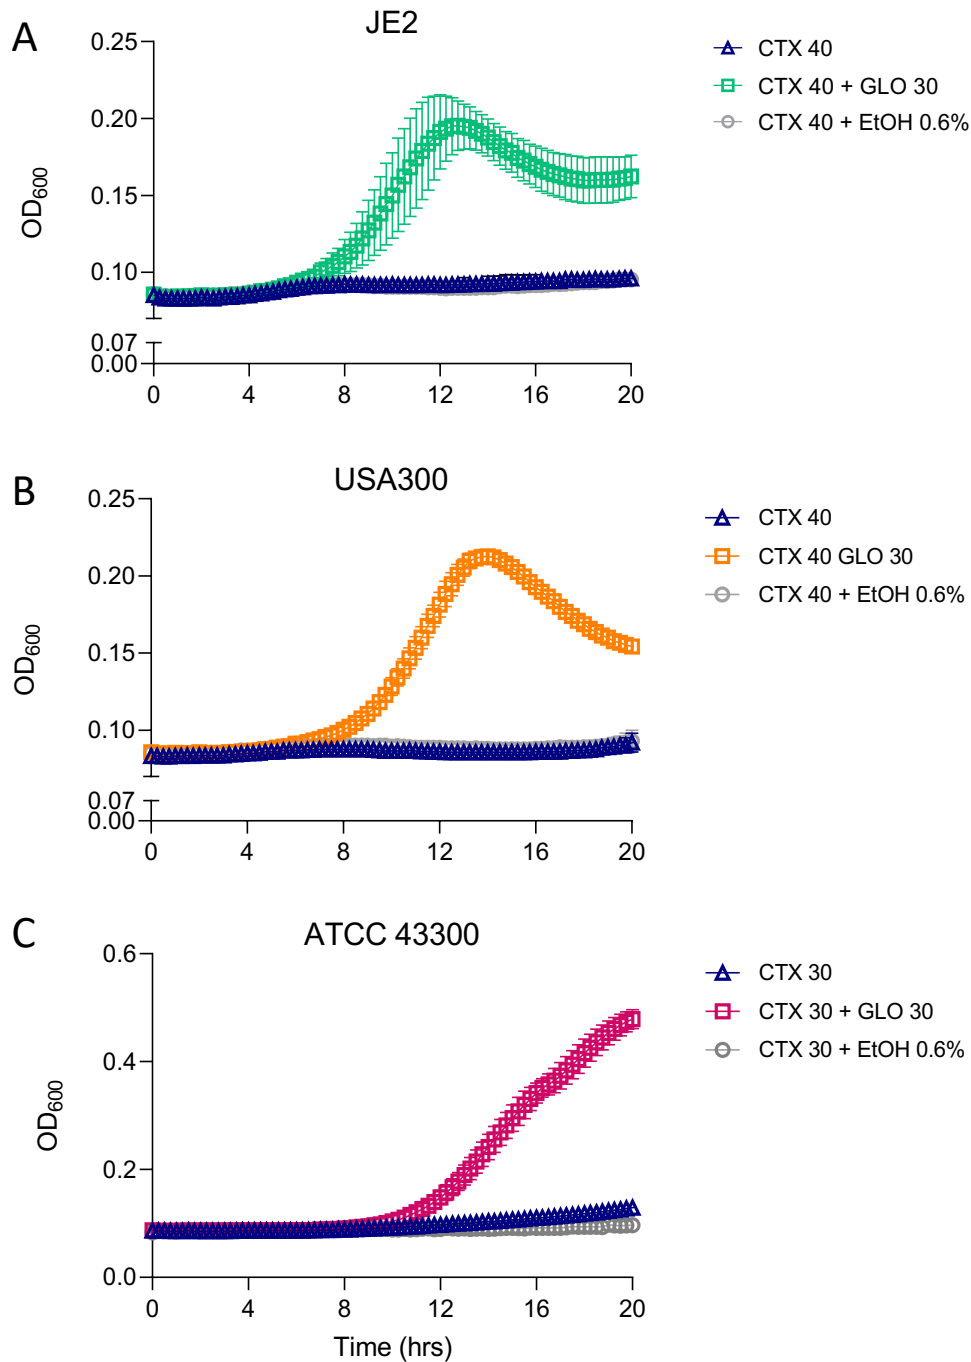

573

574 **Fig. 5. Globomycin increases cefotaxime resistance in JE2, USA300 and ATCC43300. (A)** JE2  
575 was grown in MHB 2% NaCl supplemented with cefotaxime (CTX) 40 µg/ml, MHB 2% NaCl  
576 supplemented with CTX 40 µg/ml and globomycin 30 µg/ml or MHB 2% NaCl supplemented  
577 with CTX 40 µg/ml and 0.6% ethanol (control solvent for globomycin). **(B)** USA300 was grown  
578 in MHB 2% NaCl supplemented with CTX 40 µg/ml, MHB 2% NaCl supplemented with CTX 40  
579 µg/ml and globomycin 30 µg/ml or MHB 2% NaCl supplemented with CTX 40 µg/ml and 0.6%  
580 ethanol (control solvent for globomycin). **(C)** ATCC 43300 was grown in MHB 2% NaCl  
581 supplemented with CTX 30 µg/ml, MHB 2% NaCl supplemented with CTX 30 µg/ml and  
582 globomycin 30 µg/ml or MHB 2% NaCl supplemented with CTX 30 µg/ml and 0.6% ethanol  
583 (control solvent for globomycin). The cefotaxime and globomycin concentrations used in these  
584 experiments were determined empirically for each strain. The cultures were grown in a Tecan

585 Sunrise incubated microplate reader for 24 h at 35°C OD<sub>600</sub> was recorded at 15 min intervals  
586 and growth curves were plotted in Prism software (GraphPad). The data presented are the  
587 average of 3 independent biological replicates, and error bars represent standard deviations.  
588

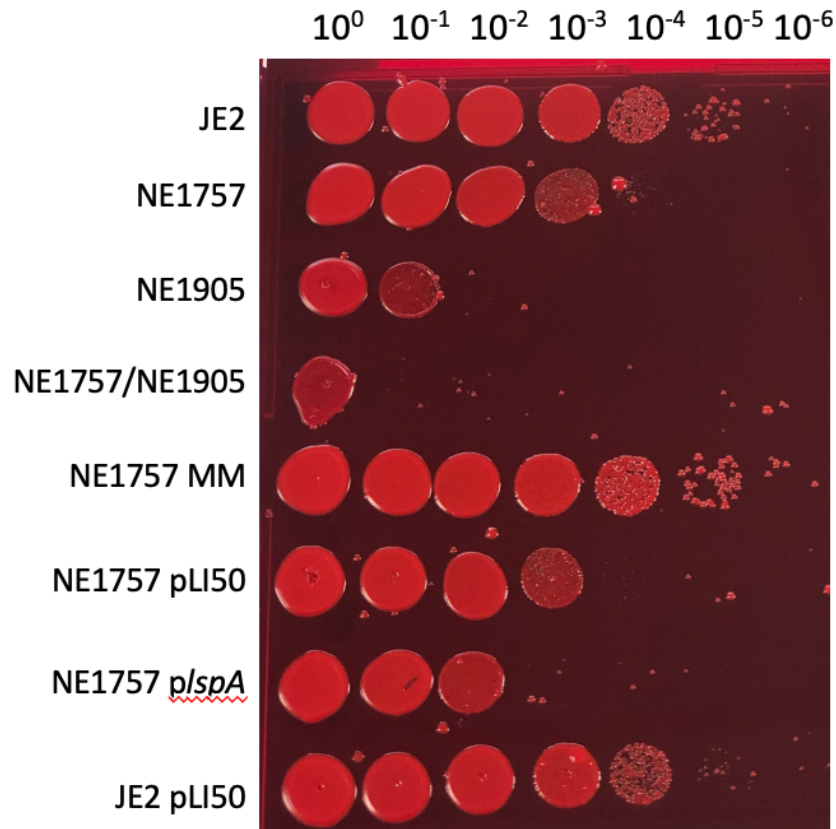

589  
590

591 **Fig. 6. Mutation of *Igt* increases susceptibility to Congo red.** Overnight cultures of JE2,  
592 NE1757 (*IspA*), NE1905 (*Igt*), NE1757/NE1905 (*Igt/IspA*), NE1757 MM (markerless *IspA*  
593 mutation), NE1757 pLI50, NE1757 p/spA and JE2 pLI50 were grown in TSB (without antibiotic  
594 selection), normalised to an OD<sub>600</sub> of 1 in PBS, serially diluted and spotted onto TSA plates  
595 supplemented with 0.125% Congo red, and the plates were incubated for 24 h at 37°C. A  
596 representative image is shown.  
597

598

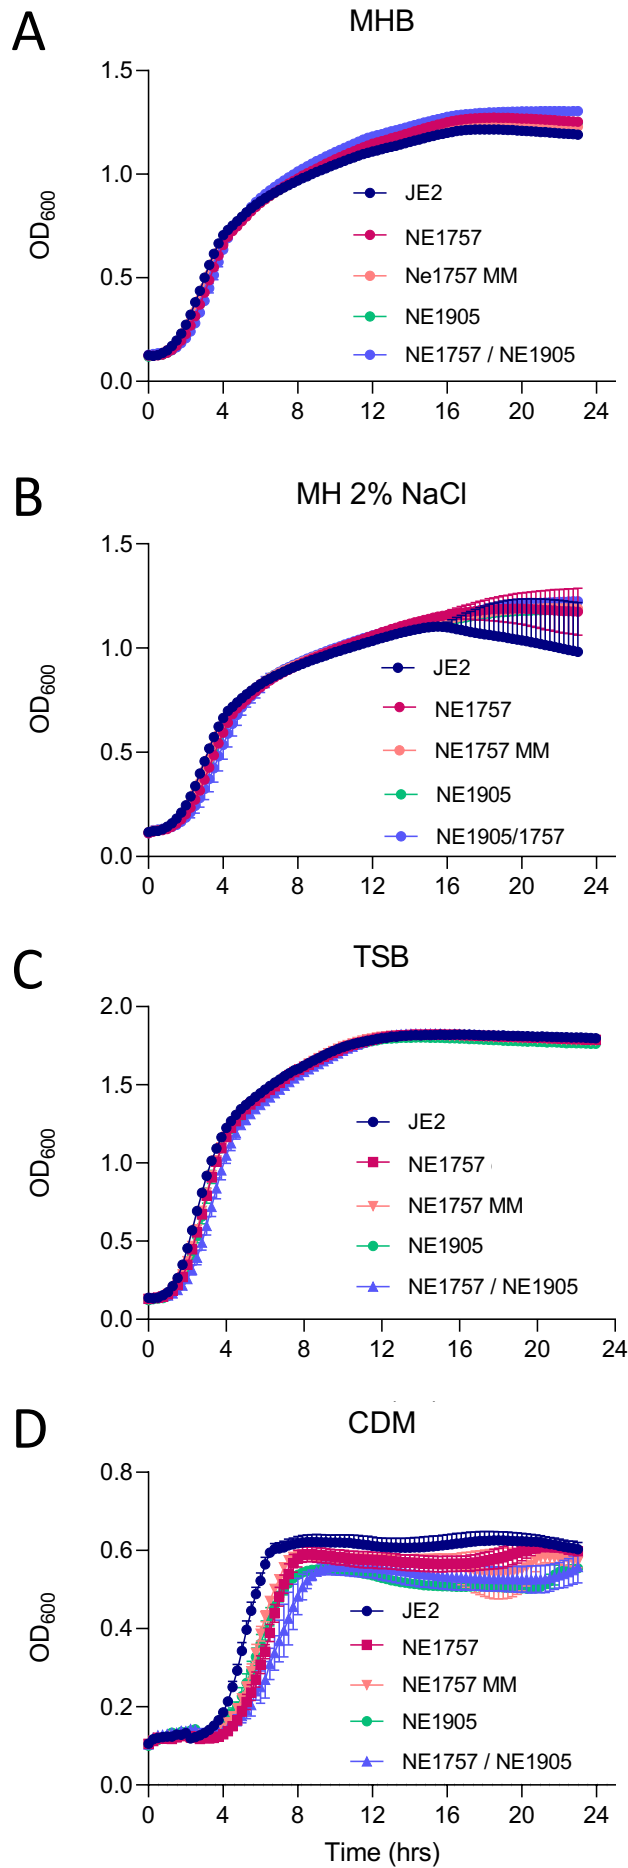

599 **Fig. 7. Mutation of *lspA* or *lgt* impacts growth in nutrient limited media but not in complex**  
600 **media.** Growth of JE2 wild type, NE1757 (*lspA*::Tn), NE1757 MM (markerless *lspA*::Tn), NE1905  
601 (*lgt*::Tn) and NE1757/NE1905 (markerless *lspA*::Tn / *lgt*::Tn) in Muller Hinton broth **(A)**, Muller  
602 Hinton broth with 2% NaCl **(B)**, TSB **(C)**, and chemically-defined medium **(D)**. Growth  
603 experiments were performed in 96-well hydrophobic plates in a Tecan Sunrise incubated  
604 microplate reader for 24 h at 37°C. OD<sub>600</sub> was recorded at 15 min intervals and growth curves  
605 were plotted in Prism software (GraphPad). The data presented are the average of 3  
606 independent biological replicates, and error bars represent standard deviations.

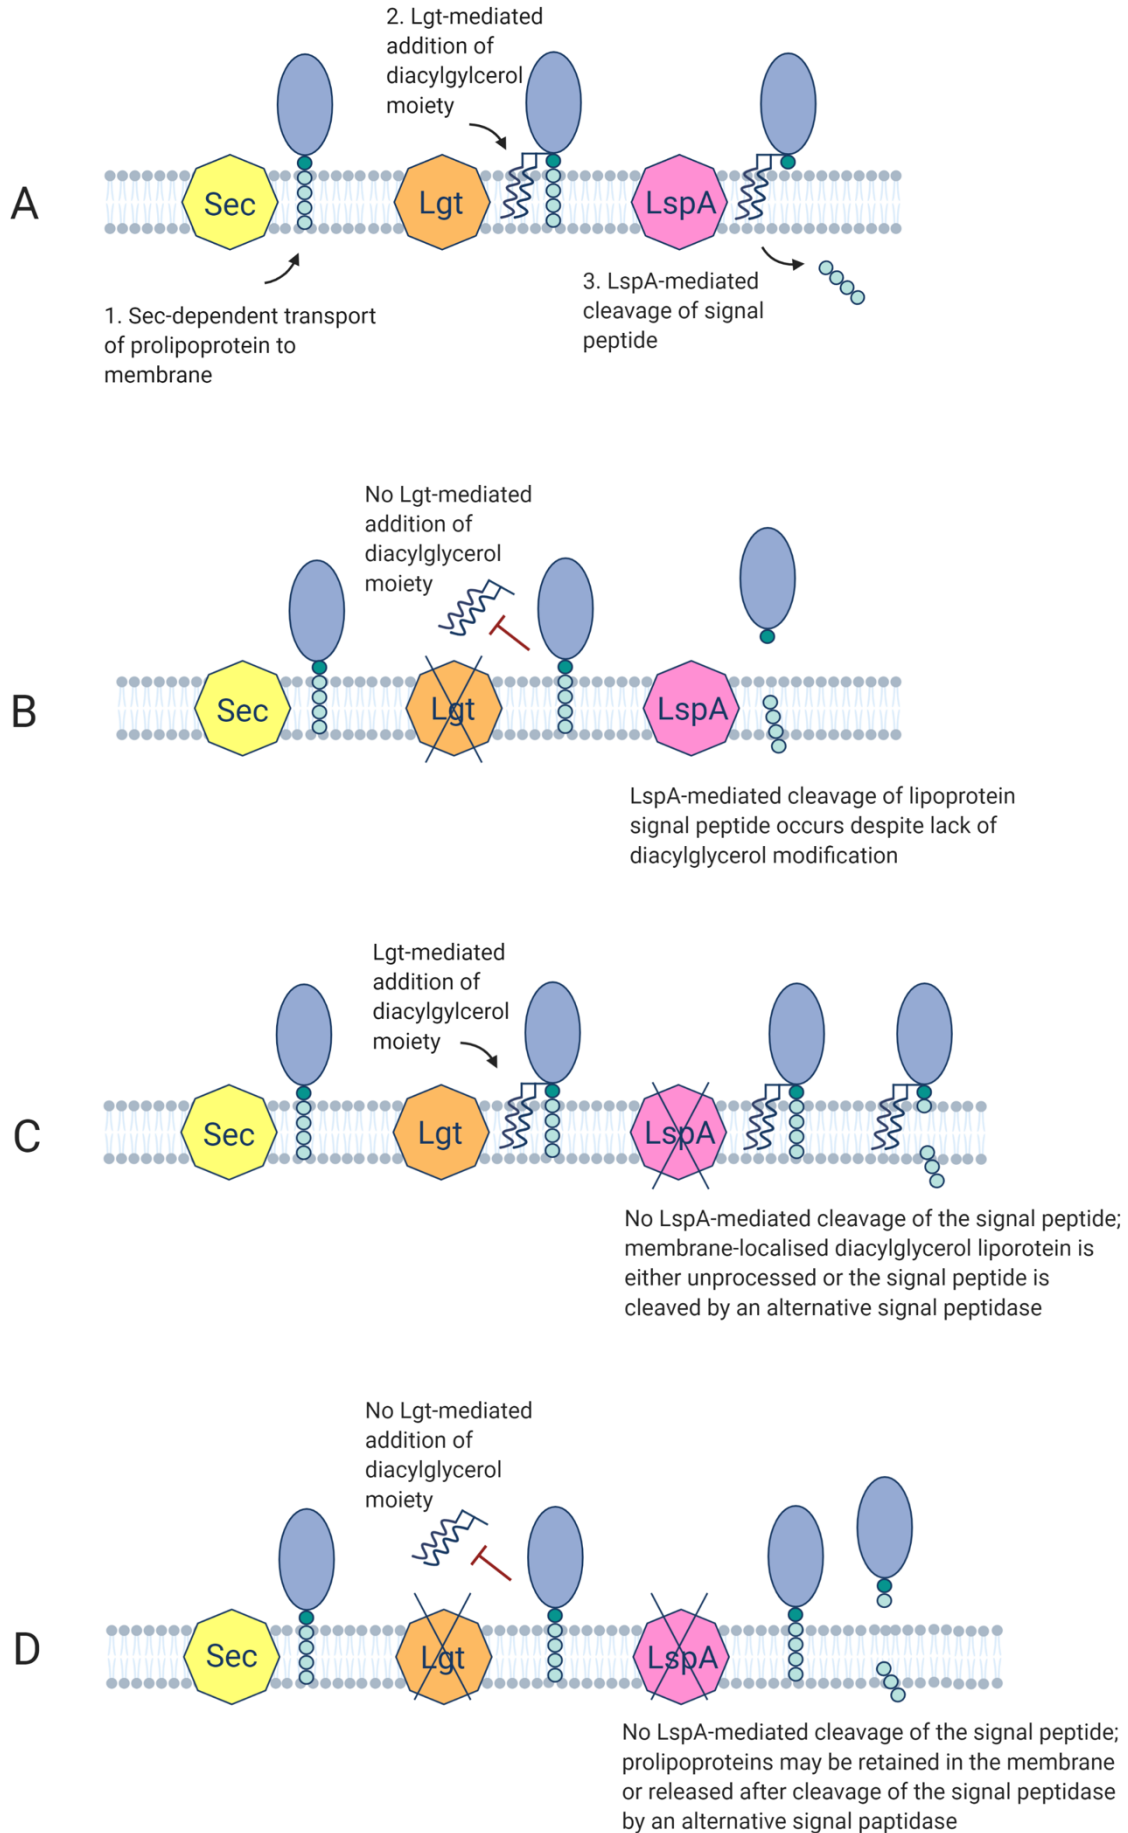

608 **Fig. 8. Predicted impacts of *lgt*, *lspA* and *lgt/lspA* mutations on lipoprotein processing in *S.***  
609 ***aureus*. (A)** Overview of lipoprotein processing in Gram-positive bacteria. **(B)** The *lgt* mutant  
610 lacks diacylglyceryl transferase activity and is unable to add the diacylglycerol molecule to the  
611 prolipoprotein, thus blocking accumulation of the LspA substrate. The prolipoprotein is likely  
612 to be released from the membrane due to LspA-mediated cleavage of the signal peptide. **(C)**  
613 LspA-mediated cleavage of the signal peptide is absent in the *lspA* mutant, but an alternative  
614 signal peptidase may undertake this activity. **(D)** Prolipoproteins are not processed in mutants  
615 lacking Lgt and LspA activity, and may be retained in the membrane or released after cleavage  
616 of the signal peptide by an alternative signal peptidase.

617



618

619

620

621

622

623

624

625

626

627

628

629

## **Supplementary Tables and Figures**

630

631

632 **Supplementary Table S1.** Genome sequence changes in NE1757 (*IspA*::Tn)

| Reference Position <sup>1</sup> | Type <sup>2</sup> | Ref. <sup>3</sup> | Allele <sup>4</sup> | Freq. <sup>5</sup> | Annotation                       |
|---------------------------------|-------------------|-------------------|---------------------|--------------------|----------------------------------|
| 1192002 - 1192003               | INS               | TA                | T-Tn-A              | 100                | <i>Bursa aurealis</i> transposon |

633

634 <sup>1</sup>Reference position: Position in the USA300 FPR3757 genome sequence (NC\_007793.1).

635 <sup>2</sup>Type of mutation: INS, insertion.

636 <sup>3</sup>Ref: Nucleotide base in the USA300 FPR3757 reference genome.

637 <sup>4</sup>Allele: Nucleotide base at the same position in NE1757.

638 <sup>5</sup>Freq.: % Frequency at which INS was found in NE1757 compared to JE2

639

640 **Table S2.** Bacterial strains and plasmids used in this study

| Strain/plasmid                              | Description and resistance                                                                                      | Source/reference            |
|---------------------------------------------|-----------------------------------------------------------------------------------------------------------------|-----------------------------|
| <b><i>Escherichia coli</i> strains</b>      |                                                                                                                 |                             |
| HST08                                       | TaKaRa <i>E. coli</i> HST08 Premium Electro-Cells                                                               | TaKaRa                      |
| HST08 pLI50                                 | <i>E. coli</i> HST08 pLI50; Amp <sup>R</sup>                                                                    | This study                  |
| HST08 p <i>lspA</i>                         | <i>E. coli</i> HST08 p <i>lspA</i> ; Amp <sup>R</sup>                                                           | This study                  |
| <b><i>Staphylococcus aureus</i> strains</b> |                                                                                                                 |                             |
| JE2                                         | JE2 (plasmid-cured derivative of strain LAC)                                                                    | (36)                        |
| 8325-4                                      | NCTC 8325 derivative cured of prophages, methicillin susceptible, CC8.                                          | (67)                        |
| RN4220                                      | RN4220 (Restriction-deficient derivative of 8325-4)                                                             | (68)                        |
| BHICC                                       | MRSA clinical isolate; SCC <i>mec</i> type II; CC8                                                              | (39)                        |
| ATCC 29213                                  | Quality control strain for susceptibility testing; oxacillin sensitive                                          | <i>S. aureus</i> ATCC 29213 |
| ATCC 43300                                  | Quality control strain for susceptibility testing; oxacillin resistant, SCC <i>mec</i> Type II                  | <i>S. aureus</i> ATCC 43300 |
| USA300                                      | USA300_FPR3757                                                                                                  | (69)                        |
| NE1757 ( <i>lspA</i> )                      | JE2 <i>lspA</i> ::Tn; Erm <sup>R</sup>                                                                          | (36)                        |
| NE1905 ( <i>lgt</i> )                       | JE2 <i>lgt</i> ::Tn; Erm <sup>R</sup>                                                                           | (36)                        |
| NE1757 MM                                   | JE2 <i>lspA</i> :Tn (truncated, markerless Tn); Erm <sup>S</sup>                                                | This study                  |
| NE1757/NE1905                               | JE2 <i>lspA</i> MM <i>lgt</i> ::Tn; Erm <sup>R</sup>                                                            | This study                  |
| RN4220 pTnT                                 | RN4220 pTnT                                                                                                     | (36)                        |
| RN4220 pLI50                                | RN4220 pLI50; Cam <sup>R</sup>                                                                                  | This study                  |
| RN4220 p <i>lspA</i>                        | RN4220 p <i>lspA</i>                                                                                            | This study                  |
| NE1757 p <i>lspA</i>                        | JE2 <i>lspA</i> ::Tn p <i>lspA</i> ; Erm <sup>R</sup> Cam <sup>R</sup>                                          | This study                  |
| NE1757 pLI50                                | JE2 <i>lspA</i> ::Tn pLI50; Erm <sup>R</sup> Cam <sup>R</sup>                                                   | This study                  |
| JE2 pLI50                                   | JE2 pLI50; Cam <sup>R</sup>                                                                                     | This study                  |
| JE2 <i>lspA</i> MM pLI50                    | JE2 <i>lspA</i> MM pLI50; Cam <sup>R</sup>                                                                      | This study                  |
| NE1757 MM p <i>lspA</i>                     | JE2 <i>lspA</i> MM p <i>lspA</i> ; Cam <sup>R</sup>                                                             | This study                  |
| JE2 <i>lspA</i> ::Tn #2                     | JE2 <i>lspA</i> ::Tn; Erm <sup>R</sup>                                                                          | This study                  |
| JE2 <i>lspA</i> ::Tn #4                     | JE2 <i>lspA</i> ::Tn; Erm <sup>R</sup>                                                                          | This study                  |
| NE788                                       | JE2 <i>trkA</i> ::Tn; Erm <sup>R</sup>                                                                          | (36)                        |
| NE460                                       | JE2 <i>atl</i> ::Tn; Erm <sup>R</sup>                                                                           | (36)                        |
| NE107                                       | JE2 <i>ecsB</i> ::Tn; Erm <sup>r</sup>                                                                          | (36)                        |
| <b>Plasmids</b>                             |                                                                                                                 |                             |
| pTnT                                        | Plasmid to replace Erm <sup>R</sup> marker from transposon mutants with a markerless mutation. Cam <sup>R</sup> | (58)                        |
| pLI50                                       | <i>S. aureus</i> - <i>E. coli</i> shuttle vector                                                                | (70)                        |
| p <i>lspA</i>                               | pLI50 carrying the <i>lspA</i> gene from JE2                                                                    | This study                  |

641

642

643 **Table S3.** Oligonucleotides used in this study

| <b>Target</b>                          | <b>Name</b>               | <b>Primer Sequence (5' – 3')</b>                           |
|----------------------------------------|---------------------------|------------------------------------------------------------|
| <i>lspA</i> (infusion primers)         | NE1757_INF#3_Fwd          | TCGTCTCAAGAATTTTATGAAGGAGGCTGGGACA                         |
|                                        | NE1757_INF#3_Rev          | TACCGAGCTCGAATTCAGGCAGCAACTTATCTACACG                      |
| <b>Tn-check primers</b><br><i>lspA</i> | <b>Name</b><br>NE1757_fwd | <b>Primer Sequence (5' – 3')</b><br>GTTCCAGCCTGCTTTCCTAATT |
|                                        | NE1757_rev                | ACACGCATACCTGTTTGTTCT                                      |
| <i>lgt</i>                             | NE1905_fwd                | GCATTAACACGGCCGAAGAA                                       |
|                                        | NE1905_rev                | CAACCGTACCAGCTGCAAC                                        |

644

645

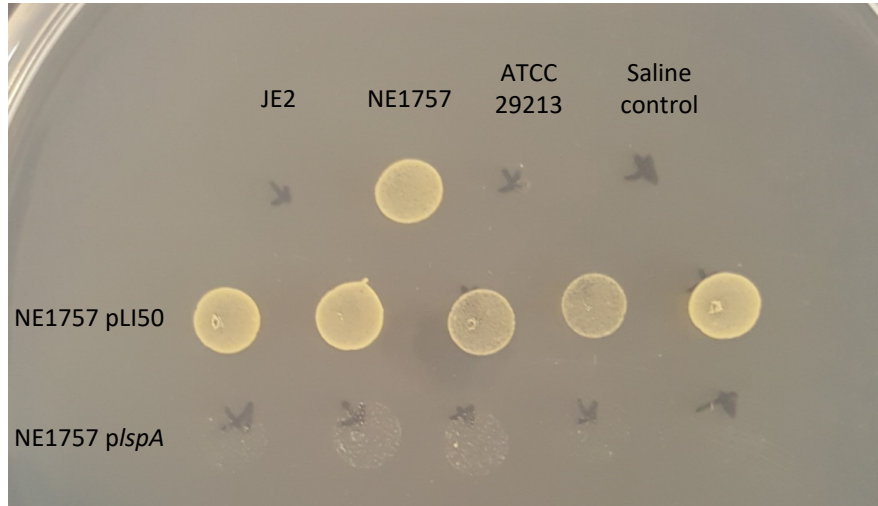

646

647

648 **Supplementary Fig. S1. Complementation of the NE1757 mutant with the *lspA* gene is**  
649 **accompanied by a wild type oxacillin resistance phenotype.** JE2, NE1757 (*lspA*::Tn), NE1757  
650 pLI50 and NE1757 p/*lspA* were grown on MHA 2% NaCl supplemented with oxacillin 32 µg/ml.  
651 The plate shows 5 biological replicates each for NE1757 pLI50 and NE1757 p/*lspA*. ATCC 29213  
652 was included as an oxacillin susceptible control.

653

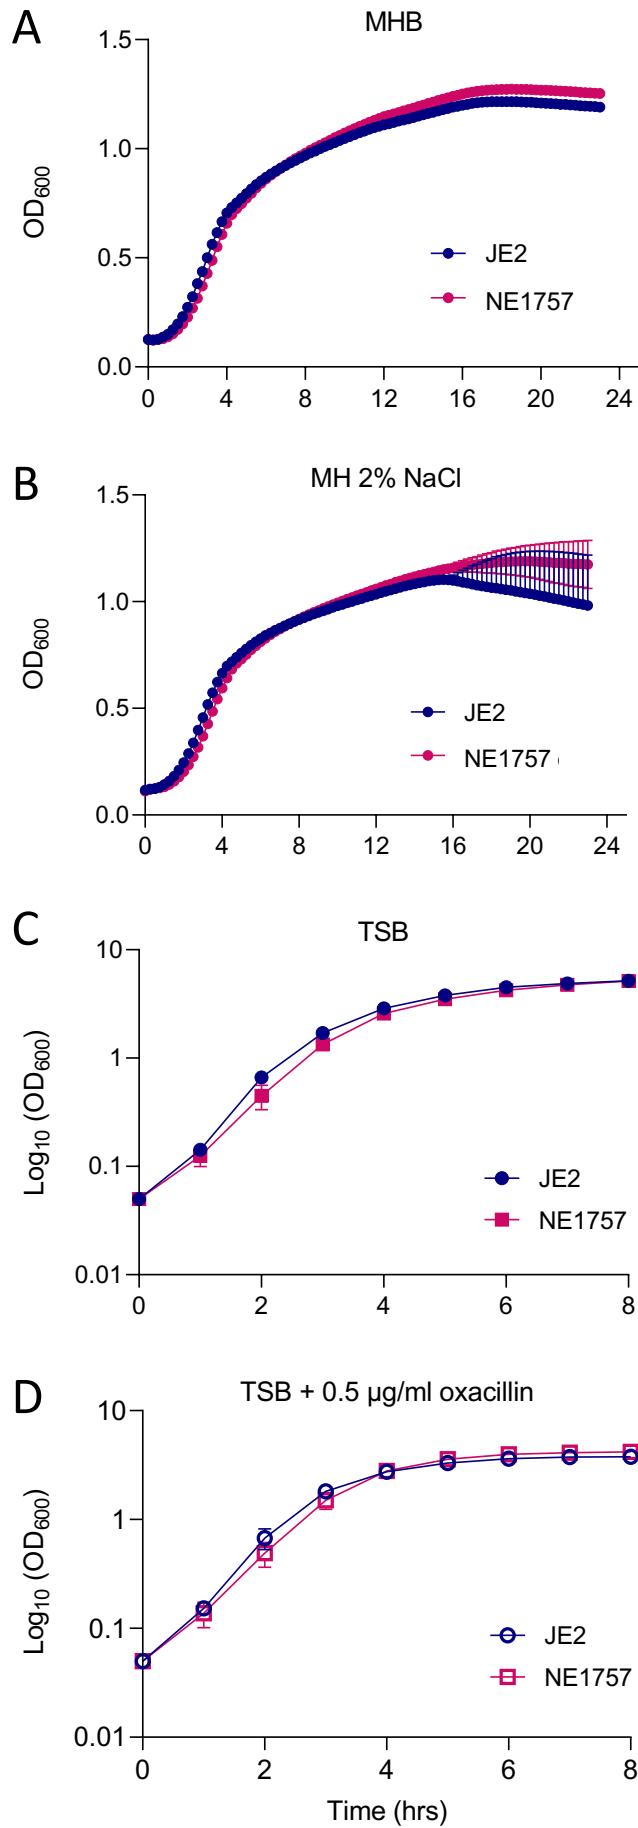

655 **Supplementary Fig. S2. Mutation of *lspA* does not impact growth in MHB or TSB media.**  
656 Growth of JE2 and NE1757 cultures in **(A)** MHB, **(B)** MHB 2% NaCl, **(C)** TSB and **(D)** TSB  
657 0.5mg/ml oxacillin. MHB cultures were grown in 96-well plates in a Tecan Sunrise incubated  
658 microplate reader for 24 h at 37°C. The OD<sub>600</sub> was recorded at 15 min intervals and growth  
659 curves were plotted in Prism software (GraphPad). TSB cultures were grown in flasks and  
660 the OD<sub>600</sub> monitored every 2 h. All data presented are the average of 3 independent biological  
661 replicates, and error bars represent standard deviations.

662

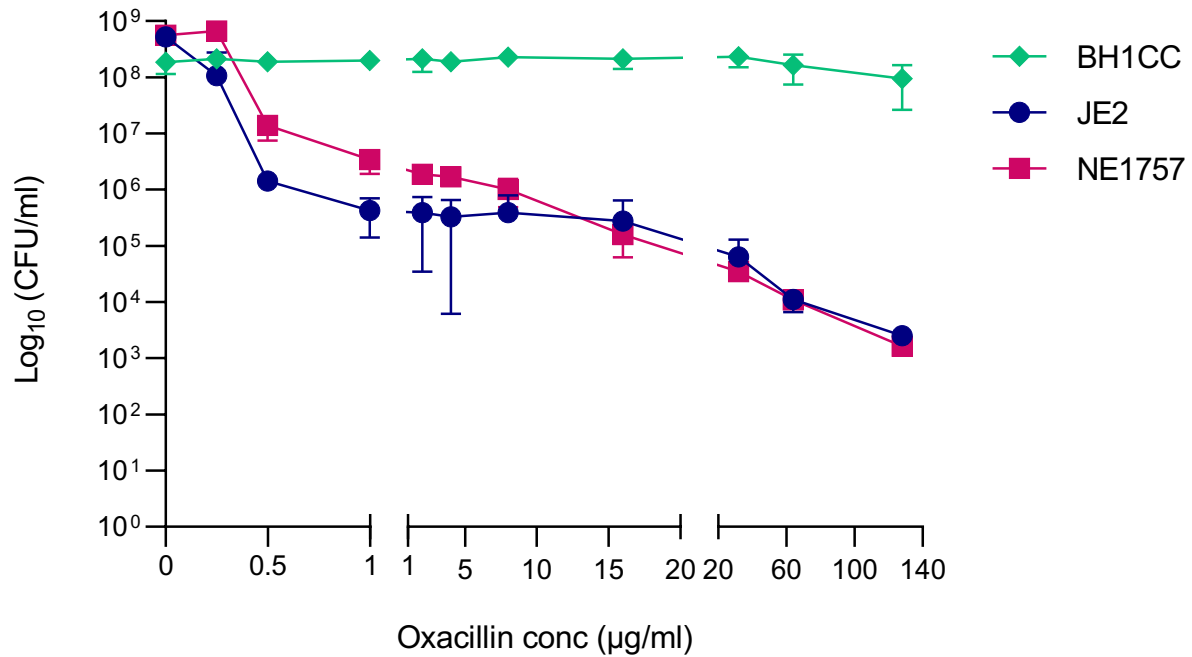

663  
664  
665  
666  
667  
668  
669  
670  
671  
672

**Supplementary Fig. S3. Population analysis profiling shows that the *lspA* mutant NE1757 exhibits heterogenous resistance to oxacillin.** Overnight cultures of JE2, NE1757 and BH1CC were grown in TSB, adjusted to OD<sub>600</sub> of 1, serially diluted and plated onto TSA and TSA supplemented with 0.25, 0.5, 1, 2, 4, 8, 16, 32, 64 and 128 µg/ml oxacillin. CFUs were enumerated after overnight incubation at 37°C. The data are expressed as CFU/ml at each oxacillin concentration, plotted using Prism software (GraphPad). Three independent experiments were performed, and error bars represent standard deviations. BH1CC, which exhibits homogenous oxacillin resistance, was included as a positive control.



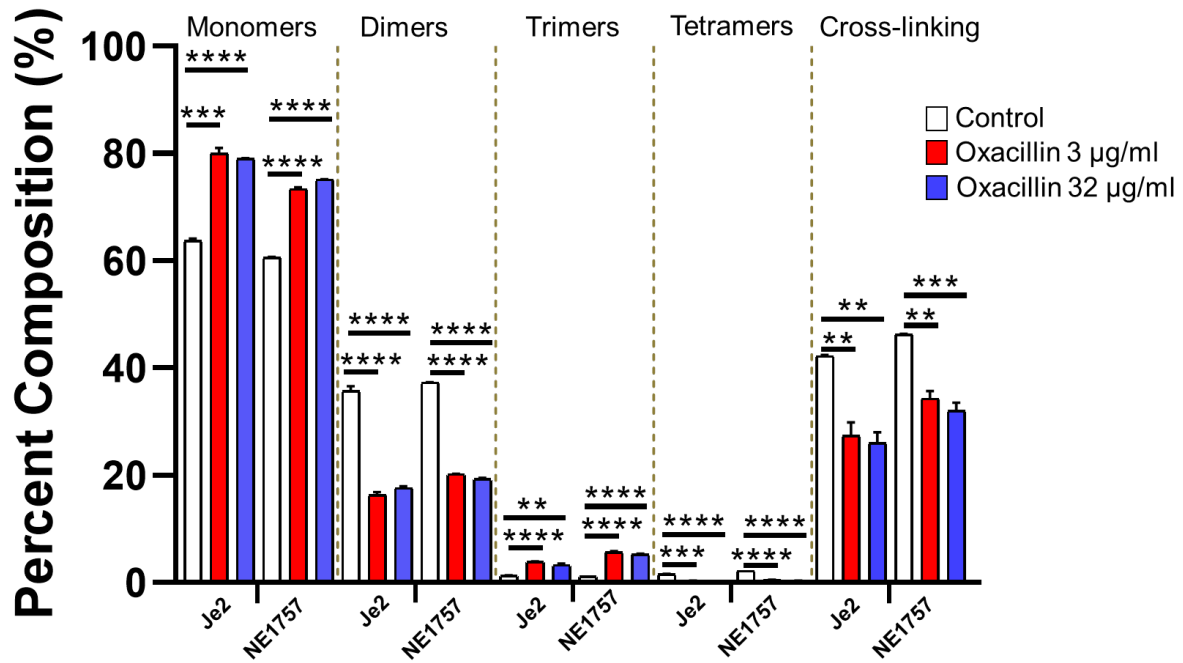

673  
674  
675  
676  
677  
678  
679  
680  
681

**Supplementary Fig. S4. Relative proportions of cell wall muropeptide fractions based on oligomerization and relative cross-linking efficiency of cell wall muropeptide fractions in peptidoglycan extracted from JE2 and NE1757.** Cells were collected from cultures grown to exponential phase in MHB or MHB supplemented with oxacillin 3 µg/ml or 32 µg/ml. Each profile shown is a representative of 3 biological replicates. Significant differences determined using Students t-test (\*\*P < .01; \*\*\*P < .001; \*\*\*\*P < .0001).

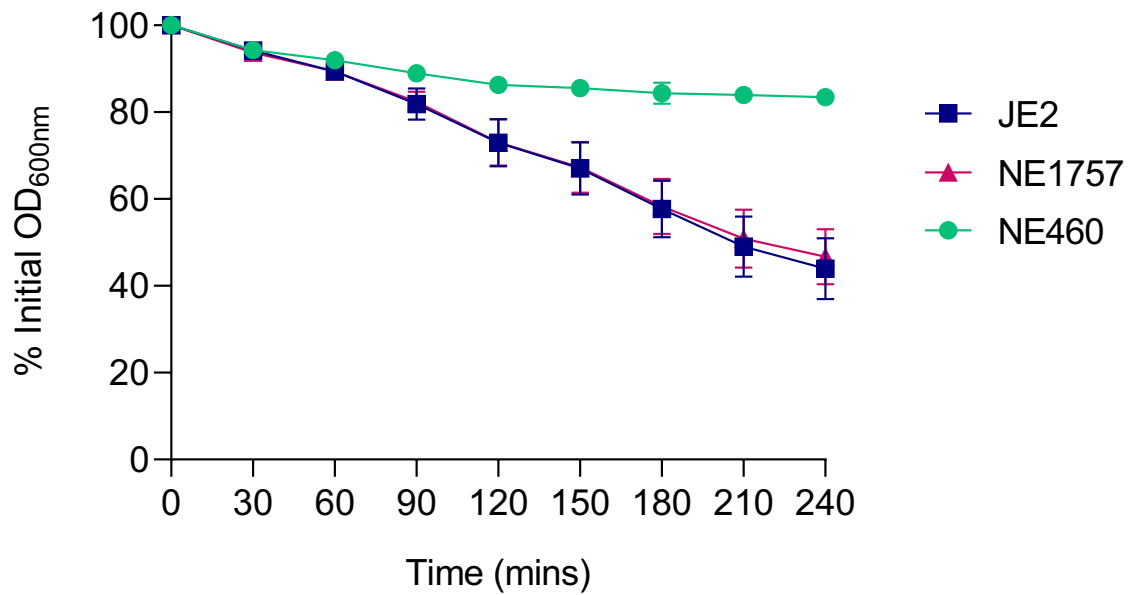

682

683

684

685 **Supplementary Fig. S5. Autolytic activity is unaffected by the *lspA* mutation.** Triton X-100-  
686 induced autolysis of JE2, NE1757 (*lspA*::Tn) and NE406 (*atl*::Tn, negative control). The strains  
687 were grown to OD<sub>600</sub> = 0.5 in MHB medium at 37°C, before being washed in cold PBS and  
688 resuspended in 0.1% Triton X-100. The OD<sub>600</sub> was monitored, and autolysis was expressed as  
689 a percentage of the initial OD<sub>600</sub>. The experiments were repeated 3 independent times,  
690 plotted using Prism software (GraphPad) and standard deviations are shown.

691

691

692

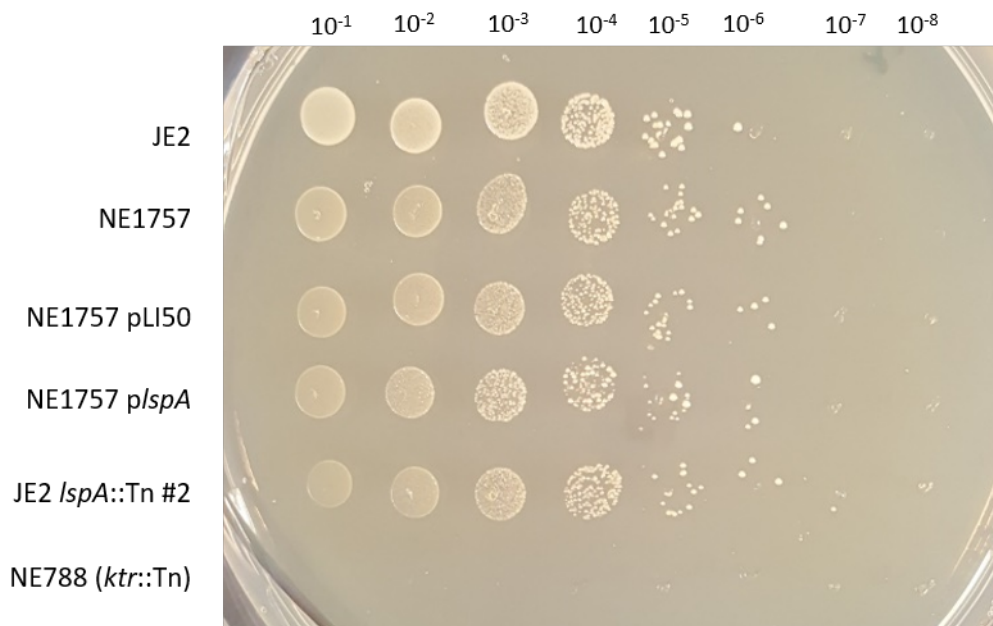

693

694 **Supplementary Fig. S6. Mutation of *IspA* has no significant impact on salt tolerance in JE2.**

695 Overnight cultures of JE2, NE1757, NE1757 pLI50, NE1757 pIspA, JE2 *IspA*::Tn #2 transductant  
696 and NE788 (JE2 *ktr*::Tn, NaCl-sensitive control) were grown in TSB and cell density was  
697 standardised to OD<sub>600</sub> of 1. Four  $\mu$ l aliquots from 10-fold serial dilutions were spotted onto  
698 TSA supplemented with 2.2 M NaCl and the plates incubated overnight at 37°C. Three  
699 independent experiments were carried out and a representative image of a plate is shown

700

701

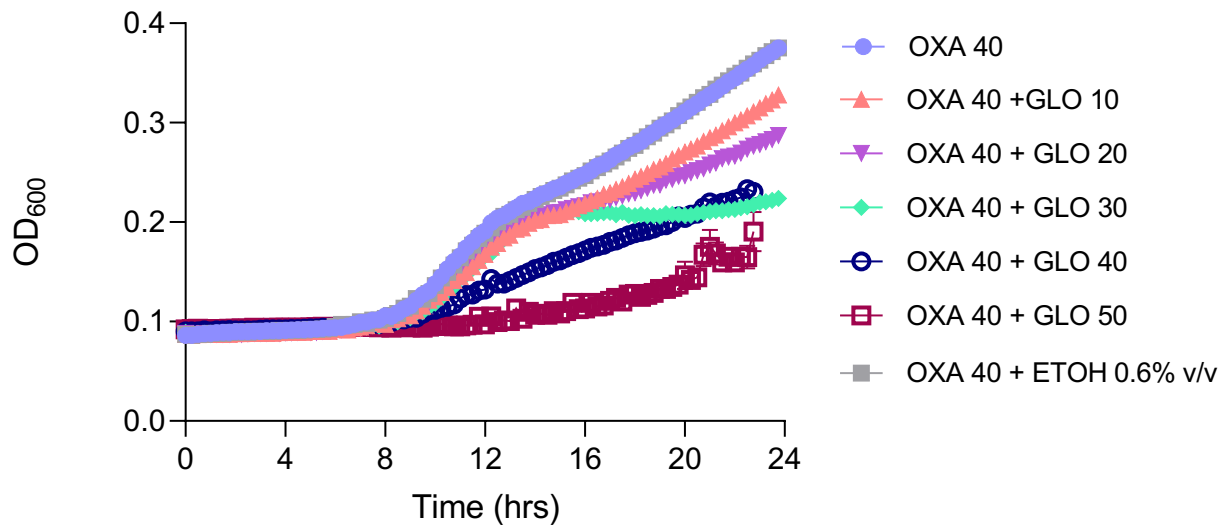

702

703 **Supplementary Fig. S7. Globomycin does not increase oxacillin resistance in the *lspA* mutant**

704 **NE1757.** NE1757 was grown in MHB 2% NaCl supplemented with a sub-inhibitory

705 concentration of oxacillin (40  $\mu\text{g}/\text{ml}$ ) and a range (10 – 50  $\mu\text{g}/\text{ml}$ ) of globomycin

706 concentrations. The solvent for globomycin, 0.6% ethanol, was included as a control. The

707 cultures were grown in a Tecan Sunrise incubated microplate reader for 24 h at 35°C. OD<sub>600</sub>

708 was recorded at 15 min intervals and growth curves were plotted in Prism software

709 (GraphPad). The data presented are the average of 3 independent biological replicates, and

710 error bars represent standard deviations.

711

## 712 References

- 713 1. Gründling, A. (2016) Cell Wall Assembly and Physiology. in *Staphylococcus: Genetics*  
714 *and Physiology* (Somerville, G. A. ed.), Caister Academic Press, UK. pp 133-170
- 715 2. Dordel, J., Kim, C., Chung, M., Pardos de la Gandara, M., Holden, M. T., Parkhill, J., de  
716 Lencastre, H., Bentley, S. D., and Tomasz, A. (2014) Novel determinants of antibiotic  
717 resistance: identification of mutated loci in highly methicillin-resistant subpopulations  
718 of methicillin-resistant *Staphylococcus aureus*. *MBio* **5**, e01000
- 719 3. Pozzi, C., Waters, E. M., Rudkin, J. K., Schaeffer, C. R., Lohan, A. J., Tong, P., Loftus, B.  
720 J., Pier, G. B., Fey, P. D., Massey, R. C., and O'Gara, J. P. (2012) Methicillin resistance  
721 alters the biofilm phenotype and attenuates virulence in *Staphylococcus aureus*  
722 device-associated infections. *PLoS Pathog* **8**, e1002626
- 723 4. Corrigan, R. M., Abbott, J. C., Burhenne, H., Kaefer, V., and Grundling, A. (2011) c-di-  
724 AMP is a new second messenger in *Staphylococcus aureus* with a role in controlling  
725 cell size and envelope stress. *PLoS Pathog* **7**, e1002217
- 726 5. Dengler, V., McCallum, N., Kiefer, P., Christen, P., Patrignani, A., Vorholt, J. A., Berger-  
727 Bachi, B., and Senn, M. M. (2013) Mutation in the C-di-AMP cyclase *dacA* affects  
728 fitness and resistance of methicillin resistant *Staphylococcus aureus*. *PLoS One* **8**,  
729 e73512
- 730 6. Panchal, V. V., Griffiths, C., Mosaei, H., Bilyk, B., Sutton, J. A. F., Carnell, O. T., Hornby,  
731 D. P., Green, J., Hobbs, J. K., Kelley, W. L., Zenkin, N., and Foster, S. J. (2020) Evolving  
732 MRSA: High-level beta-lactam resistance in *Staphylococcus aureus* is associated with  
733 RNA Polymerase alterations and fine tuning of gene expression. *PLoS Pathog* **16**,  
734 e1008672
- 735 7. Baek, K. T., Grundling, A., Mogensen, R. G., Thogersen, L., Petersen, A., Paulander, W.,  
736 and Frees, D. (2014) beta-Lactam resistance in methicillin-resistant *Staphylococcus*  
737 *aureus* USA300 is increased by inactivation of the ClpXP protease. *Antimicrob Agents*  
738 *Chemother* **58**, 4593-4603
- 739 8. Jensen, C., Baek, K. T., Gallay, C., Thalso-Madsen, I., Xu, L., Jouselin, A., Ruiz Torrubia,  
740 F., Paulander, W., Pereira, A. R., Veening, J. W., Pinho, M. G., and Frees, D. (2019) The  
741 ClpX chaperone controls autolytic splitting of *Staphylococcus aureus* daughter cells,  
742 but is bypassed by beta-lactam antibiotics or inhibitors of WTA biosynthesis. *PLoS*  
743 *Pathog* **15**, e1008044
- 744 9. Giulieri, S. G., Guerillot, R., Kwong, J. C., Monk, I. R., Hayes, A. S., Daniel, D., Baines, S.,  
745 Sherry, N. L., Holmes, N. E., Ward, P., Gao, W., Seemann, T., Stinear, T. P., and Howden,  
746 B. P. (2020) Comprehensive Genomic Investigation of Adaptive Mutations Driving the  
747 Low-Level Oxacillin Resistance Phenotype in *Staphylococcus aureus*. *mBio* **11**
- 748 10. Shahmirzadi, S. V., Nguyen, M. T., and Gotz, F. (2016) Evaluation of *Staphylococcus*  
749 *aureus* Lipoproteins: Role in Nutritional Acquisition and Pathogenicity. *Front Microbiol*  
750 **7**, 1404
- 751 11. Dartois, V., Djavakhishvili, T., and Hoch, J. A. (1997) KapB is a lipoprotein required for  
752 KinB signal transduction and activation of the phosphorelay to sporulation in *Bacillus*  
753 *subtilis*. *Mol Microbiol* **26**, 1097-1108
- 754 12. Bengtsson, J., Tjalsma, H., Rivolta, C., and Hederstedt, L. (1999) Subunit II of *Bacillus*  
755 *subtilis* cytochrome c oxidase is a lipoprotein. *J Bacteriol* **181**, 685-688
- 756 13. Jacobs, M., Andersen, J. B., Kontinen, V., and Sarvas, M. (1993) *Bacillus subtilis* PrsA is  
757 required in vivo as an extracytoplasmic chaperone for secretion of active enzymes  
758 synthesized either with or without pro-sequences. *Mol Microbiol* **8**, 957-966

- 759 14. Mei, J. M., Nourbakhsh, F., Ford, C. W., and Holden, D. W. (1997) Identification of  
760 Staphylococcus aureus virulence genes in a murine model of bacteraemia using  
761 signature-tagged mutagenesis. *Mol Microbiol* **26**, 399-407
- 762 15. Nielsen, J. B., and Lampen, J. O. (1982) Membrane-bound penicillinases in Gram-  
763 positive bacteria. *J Biol Chem* **257**, 4490-4495
- 764 16. Nguyen, M. T., Kraft, B., Yu, W., Demircioglu, D. D., Hertlein, T., Burian, M., Schmalzer,  
765 M., Boller, K., Bekeredjian-Ding, I., Ohlsen, K., Schitteck, B., and Gotz, F. (2015) The  
766 nuSaalpha Specific Lipoprotein Like Cluster (lpl) of S. aureus USA300 Contributes to  
767 Immune Stimulation and Invasion in Human Cells. *PLoS Pathog* **11**, e1004984
- 768 17. Kovacs-Simon, A., Titball, R. W., and Michell, S. L. (2011) Lipoproteins of bacterial  
769 pathogens. *Infect Immun* **79**, 548-561
- 770 18. Nguyen, M. T., Matsuo, M., Niemann, S., Herrmann, M., and Gotz, F. (2020)  
771 Lipoproteins in Gram-Positive Bacteria: Abundance, Function, Fitness. *Front Microbiol*  
772 **11**, 582582
- 773 19. Schmollinger, M., Fischer, I., Nerz, C., Pinkenburg, S., Gotz, F., Kaufmann, M., Lange,  
774 K. J., Reuter, R., Rosenstiel, W., and Zell, A. (2004) ParSeq: searching motifs with  
775 structural and biochemical properties. *Bioinformatics* **20**, 1459-1461
- 776 20. Inouye, S., Wang, S., Sekizawa, J., Halegoua, S., and Inouye, M. (1977) Amino acid  
777 sequence for the peptide extension on the prolipoprotein of the Escherichia coli outer  
778 membrane. *Proc Natl Acad Sci U S A* **74**, 1004-1008
- 779 21. Buddelmeijer, N. (2015) The molecular mechanism of bacterial lipoprotein  
780 modification--how, when and why? *FEMS Microbiol Rev* **39**, 246-261
- 781 22. Hayashi, S., and Wu, H. C. (1990) Lipoproteins in bacteria. *J Bioenerg Biomembr* **22**,  
782 451-471
- 783 23. Braun, V., and Wu, H. C. (1994) Lipoproteins, structure, function, biosynthesis and  
784 model for protein export. in *New Comprehensive Biochemistry* (Ghuysen, J.-M., and  
785 Hakenbeck, R. eds.), Elsevier. pp 319-341
- 786 24. Sankaran, K., and Wu, H. C. (1994) Lipid modification of bacterial prolipoprotein.  
787 Transfer of diacylglycerol moiety from phosphatidylglycerol. *J Biol Chem* **269**, 19701-  
788 19706
- 789 25. Ichihara, S., Hussain, M., and Mizushima, S. (1982) Mechanism of export of outer  
790 membrane lipoproteins through the cytoplasmic membrane in Escherichia coli.  
791 Binding of lipoprotein precursors to the peptidoglycan layer. *J Biol Chem* **257**, 495-500
- 792 26. Sankaran, K., Gupta, S. D., and Wu, H. C. (1995) Modification of bacterial lipoproteins.  
793 *Methods Enzymol* **250**, 683-697
- 794 27. Tschumi, A., Nai, C., Auchli, Y., Hunziker, P., Gehrig, P., Keller, P., Grau, T., and Sander,  
795 P. (2009) Identification of apolipoprotein N-acyltransferase (Lnt) in mycobacteria. *J*  
796 *Biol Chem* **284**, 27146-27156
- 797 28. Asanuma, M., Kurokawa, K., Ichikawa, R., Ryu, K. H., Chae, J. H., Dohmae, N., Lee, B.  
798 L., and Nakayama, H. (2011) Structural evidence of alpha-aminoacylated lipoproteins  
799 of Staphylococcus aureus. *Febs J* **278**, 716-728
- 800 29. Gardiner, J. H. t., Komazin, G., Matsuo, M., Cole, K., Gotz, F., and Meredith, T. C. (2020)  
801 Lipoprotein N-Acylation in Staphylococcus aureus Is Catalyzed by a Two-Component  
802 Acyl Transferase System. *mBio* **11**
- 803 30. An, F. Y., Sulavik, M. C., and Clewell, D. B. (1999) Identification and characterization of  
804 a determinant (eep) on the Enterococcus faecalis chromosome that is involved in  
805 production of the peptide sex pheromone cAD1. *J Bacteriol* **181**, 5915-5921

- 806 31. Varahan, S., Harms, N., Gilmore, M. S., Tomich, J. M., and Hancock, L. E. (2014) An ABC  
807 transporter is required for secretion of peptide sex pheromones in *Enterococcus*  
808 *faecalis*. *mBio* **5**, e01726-01714
- 809 32. Schilcher, K., Caesar, L. K., Cech, N. B., and Horswill, A. R. (2020) Processing, Export,  
810 and Identification of Novel Linear Peptides from *Staphylococcus aureus*. *mBio* **11**
- 811 33. Gan, K., Gupta, S. D., Sankaran, K., Schmid, M. B., and Wu, H. C. (1993) Isolation and  
812 characterization of a temperature-sensitive mutant of *Salmonella typhimurium*  
813 defective in prolipoprotein modification. *J Biol Chem* **268**, 16544-16550
- 814 34. Leskela, S., Wahlstrom, E., Kontinen, V. P., and Sarvas, M. (1999) Lipid modification of  
815 prelipoproteins is dispensable for growth but essential for efficient protein secretion  
816 in *Bacillus subtilis*: characterization of the *Lgt* gene. *Mol Microbiol* **31**, 1075-1085
- 817 35. Stoll, H., Dengjel, J., Nerz, C., and Gotz, F. (2005) *Staphylococcus aureus* deficient in  
818 lipidation of prelipoproteins is attenuated in growth and immune activation. *Infect*  
819 *Immun* **73**, 2411-2423
- 820 36. Fey, P. D., Endres, J. L., Yajjala, V. K., Widhelm, T. J., Boissy, R. J., Bose, J. L., and Bayles,  
821 K. W. (2013) A genetic resource for rapid and comprehensive phenotype screening of  
822 nonessential *Staphylococcus aureus* genes. *MBio* **4**, e00537-00512
- 823 37. Gohring, N., Fedtke, I., Xia, G., Jorge, A. M., Pinho, M. G., Bertsche, U., and Peschel, A.  
824 (2011) New role of the disulfide stress effector YjbH in beta-lactam susceptibility of  
825 *Staphylococcus aureus*. *Antimicrob Agents Chemother* **55**, 5452-5458
- 826 38. Chan, Y. G., Frankel, M. B., Missiakas, D., and Schneewind, O. (2016) *SagB*  
827 *Glucosaminidase* Is a Determinant of *Staphylococcus aureus* Glycan Chain Length,  
828 Antibiotic Susceptibility, and Protein Secretion. *J Bacteriol* **198**, 1123-1136
- 829 39. Gallagher, L. A., Shears, R. K., Fingleton, C., Alvarez, L., Waters, E. M., Clarke, J., Bricio-  
830 Moreno, L., Campbell, C., Yadav, A. K., Razvi, F., O'Neill, E., O'Neill, A. J., Cava, F., Fey,  
831 P. D., Kadioglu, A., and O'Gara, J. P. (2020) Impaired Alanine Transport or Exposure to  
832 d-Cycloserine Increases the Susceptibility of MRSA to beta-lactam Antibiotics. *J Infect*  
833 *Dis* **221**, 1000-1016
- 834 40. Roch, M., Lelong, E., Panasenko, O. O., Sierra, R., Renzoni, A., and Kelley, W. L. (2019)  
835 Thermosensitive PBP2a requires extracellular folding factors PrsA and HtrA1 for  
836 *Staphylococcus aureus* MRSA beta-lactam resistance. *Commun Biol* **2**, 417
- 837 41. Inukai, M., Takeuchi, M., Shimizu, K., and Arai, M. (1978) Mechanism of action of  
838 globomycin. *J Antibiot (Tokyo)* **31**, 1203-1205
- 839 42. Inukai, M., Nakajima, M., Osawa, M., Haneishi, T., and Arai, M. (1978) Globomycin, a  
840 new peptide antibiotic with spheroplast-forming activity. II. Isolation and physico-  
841 chemical and biological characterization. *J Antibiot (Tokyo)* **31**, 421-425
- 842 43. Vogeley, L., El Arnaout, T., Bailey, J., Stansfeld, P. J., Boland, C., and Caffrey, M. (2016)  
843 Structural basis of lipoprotein signal peptidase II action and inhibition by the antibiotic  
844 globomycin. *Science* **351**, 876-880
- 845 44. Yakushi, T., Tajima, T., Matsuyama, S., and Tokuda, H. (1997) Lethality of the covalent  
846 linkage between mislocalized major outer membrane lipoprotein and the  
847 peptidoglycan of *Escherichia coli*. *J Bacteriol* **179**, 2857-2862
- 848 45. Garland, K., Pantua, H., Braun, M. G., Burdick, D. J., Castanedo, G. M., Chen, Y. C.,  
849 Cheng, Y. X., Cheong, J., Daniels, B., Deshmukh, G., Fu, Y., Gibbons, P., Gloor, S. L., Hua,  
850 R., Labadie, S., Liu, X., Pastor, R., Stivala, C., Xu, M., Xu, Y., Zheng, H., Kapadia, S. B.,  
851 and Hanan, E. J. (2020) Optimization of globomycin analogs as novel gram-negative  
852 antibiotics. *Bioorg Med Chem Lett* **30**, 127419



- 853 46. Vickery, C. R., Wood, B. M., Morris, H. G., Losick, R., and Walker, S. (2018)  
854 Reconstitution of Staphylococcus aureus Lipoteichoic Acid Synthase Activity Identifies  
855 Congo Red as a Selective Inhibitor. *J Am Chem Soc* **140**, 876-879
- 856 47. Parvez, M. A., Shibata, H., Nakano, T., Niimi, S., Fujii, N., Arakaki, N., and Higuti, T.  
857 (2008) No relationship exists between PBP 2a amounts expressed in different MRSA  
858 strains obtained clinically and their beta-lactam MIC values. *J Med Invest* **55**, 246-253
- 859 48. Hartman, B. J., and Tomasz, A. (1986) Expression of methicillin resistance in  
860 heterogeneous strains of Staphylococcus aureus. *Antimicrob Agents Chemother* **29**,  
861 85-92
- 862 49. Mikkelsen, K., Sirisarn, W., Alharbi, O., Alharbi, M., Liu, H., Nohr-Meldgaard, K., Mayer,  
863 K., Vestergaard, M., Gallagher, L. M., Derrick, J. P., McBain, A. J., Biboy, J., Vollmer, W.,  
864 O'Gara, J. P., Grunert, T., Ingmer, H., and Xia, G. (2021) The Novel Membrane-  
865 Associated Auxiliary Factors AuxA and AuxB Modulate beta-lactam Resistance in  
866 MRSA by stabilizing Lipoteichoic Acids. *Int J Antimicrob Agents*, 106283
- 867 50. Campbell, J., Singh, A. K., Santa Maria, J. P., Jr., Kim, Y., Brown, S., Swoboda, J. G.,  
868 Mylonakis, E., Wilkinson, B. J., and Walker, S. (2011) Synthetic lethal compound  
869 combinations reveal a fundamental connection between wall teichoic acid and  
870 peptidoglycan biosyntheses in Staphylococcus aureus. *ACS Chem Biol* **6**, 106-116
- 871 51. Brown, S., Xia, G., Luhachack, L. G., Campbell, J., Meredith, T. C., Chen, C., Winstel, V.,  
872 Gekeler, C., Irazoqui, J. E., Peschel, A., and Walker, S. (2012) Methicillin resistance in  
873 Staphylococcus aureus requires glycosylated wall teichoic acids. *Proc Natl Acad Sci U*  
874 *S A* **109**, 18909-18914
- 875 52. Memmi, G., Filipe, S. R., Pinho, M. G., Fu, Z., and Cheung, A. (2008) Staphylococcus  
876 aureus PBP4 is essential for beta-lactam resistance in community-acquired methicillin-  
877 resistant strains. *Antimicrob Agents Chemother* **52**, 3955-3966
- 878 53. Lee, S. H., Jarantow, L. W., Wang, H., Sillaots, S., Cheng, H., Meredith, T. C., Thompson,  
879 J., and Roemer, T. (2011) Antagonism of chemical genetic interaction networks  
880 resensitize MRSA to beta-lactam antibiotics. *Chem Biol* **18**, 1379-1389
- 881 54. Gardete, S., Wu, S. W., Gill, S., and Tomasz, A. (2006) Role of VraSR in antibiotic  
882 resistance and antibiotic-induced stress response in Staphylococcus aureus.  
883 *Antimicrob Agents Chemother* **50**, 3424-3434
- 884 55. Baumgartner, M., Karst, U., Gerstel, B., Loessner, M., Wehland, J., and Jansch, L. (2007)  
885 Inactivation of Lgt allows systematic characterization of lipoproteins from *Listeria*  
886 *monocytogenes*. *J Bacteriol* **189**, 313-324
- 887 56. Henneke, P., Dramsi, S., Mancuso, G., Chraïbi, K., Pellegrini, E., Theilacker, C., Hubner,  
888 J., Santos-Sierra, S., Teti, G., Golenbock, D. T., Poyart, C., and Trieu-Cuot, P. (2008)  
889 Lipoproteins are critical TLR2 activating toxins in group B streptococcal sepsis. *J*  
890 *Immunol* **180**, 6149-6158
- 891 57. Halsey, C. R., Lei, S., Wax, J. K., Lehman, M. K., Nuxoll, A. S., Steinke, L., Sadykov, M.,  
892 Powers, R., and Fey, P. D. (2017) Amino Acid Catabolism in Staphylococcus aureus and  
893 the Function of Carbon Catabolite Repression. *mBio* **8**
- 894 58. Bose, J. L., Fey, P. D., and Bayles, K. W. (2013) Genetic tools to enhance the study of  
895 gene function and regulation in Staphylococcus aureus. *Appl Environ Microbiol* **79**,  
896 2218-2224
- 897 59. Karinou, E., Schuster, C. F., Pazos, M., Vollmer, W., and Grundling, A. (2019)  
898 Inactivation of the Monofunctional Peptidoglycan Glycosyltransferase SgtB Allows  
899 Staphylococcus aureus To Survive in the Absence of Lipoteichoic Acid. *J Bacteriol* **201**



- 900 60. Tomasz, A., Nachman, S., and Leaf, H. (1991) Stable classes of phenotypic expression  
901 in methicillin-resistant clinical isolates of staphylococci. *Antimicrob Agents Chemother*  
902 **35**, 124-129
- 903 61. Griffiths, J. M., and O'Neill, A. J. (2012) Loss of function of the gdpP protein leads to  
904 joint beta-lactam/glycopeptide tolerance in *Staphylococcus aureus*. *Antimicrob*  
905 *Agents Chemother* **56**, 579-581
- 906 62. Alvarez, L., Hernandez, S. B., de Pedro, M. A., and Cava, F. (2016) Ultra-Sensitive, High-  
907 Resolution Liquid Chromatography Methods for the High-Throughput Quantitative  
908 Analysis of Bacterial Cell Wall Chemistry and Structure. *Methods Mol Biol* **1440**, 11-27
- 909 63. de Jonge, B. L., Chang, Y. S., Gage, D., and Tomasz, A. (1992) Peptidoglycan  
910 composition of a highly methicillin-resistant *Staphylococcus aureus* strain. The role of  
911 penicillin binding protein 2A. *J Biol Chem* **267**, 11248-11254
- 912 64. De Jonge, B. L., Gage, D., and Xu, N. (2002) The carboxyl terminus of peptidoglycan  
913 stem peptides is a determinant for methicillin resistance in *Staphylococcus aureus*.  
914 *Antimicrob Agents Chemother* **46**, 3151-3155
- 915 65. Kuhner, D., Stahl, M., Demircioglu, D. D., and Bertsche, U. (2014) From cells to  
916 muropeptide structures in 24 h: peptidoglycan mapping by UPLC-MS. *Sci Rep* **4**, 7494
- 917 66. Boneca, I. G., Xu, N., Gage, D. A., de Jonge, B. L., and Tomasz, A. (1997) Structural  
918 characterization of an abnormally cross-linked muropeptide dimer that is  
919 accumulated in the peptidoglycan of methicillin- and cefotaxime-resistant mutants of  
920 *Staphylococcus aureus*. *J Biol Chem* **272**, 29053-29059
- 921 67. Horsburgh, M. J., Aish, J. L., White, I. J., Shaw, L., Lithgow, J. K., and Foster, S. J. (2002)  
922 sigmaB modulates virulence determinant expression and stress resistance:  
923 characterization of a functional rsbU strain derived from *Staphylococcus aureus* 8325-  
924 4. *J Bacteriol* **184**, 5457-5467
- 925 68. Kreiswirth, B. N., Lofdahl, S., Betley, M. J., O'Reilly, M., Schlievert, P. M., Bergdoll, M.  
926 S., and Novick, R. P. (1983) The toxic shock syndrome exotoxin structural gene is not  
927 detectably transmitted by a prophage. *Nature* **305**, 709-712
- 928 69. Diep, B. A., Gill, S. R., Chang, R. F., Phan, T. H., Chen, J. H., Davidson, M. G., Lin, F., Lin,  
929 J., Carleton, H. A., Mongodin, E. F., Sensabaugh, G. F., and Perdreau-Remington, F.  
930 (2006) Complete genome sequence of USA300, an epidemic clone of community-  
931 acquired methicillin-resistant *Staphylococcus aureus*. *Lancet* **367**, 731-739
- 932 70. Lee, C. Y., Buranen, S. L., and Ye, Z. H. (1991) Construction of single-copy integration  
933 vectors for *Staphylococcus aureus*. *Gene* **103**, 101-105  
934
